# Supplementary material for: Early stage techno-economic and environmental analysis of aluminium batteries
Source: Royal Society of Chemistry journal article supplement (doi:10.1039/d2ya00253a), 2023-01-01
Supplement: d2ya00253a1.xlsx [file d2ya00253a1.xlsx]

## Sheet: Energy Contents Cell
Active Materials (Parameters)	Formula	Theoretical Discharge Capacity	Practical Discharge Capacity	Crystallographic Density AM	Max Volume Change During (Dis-)Charge	Electrode Porosity		Specific Energy			Step pre-1	Step 1	Step pre-2	Step 2	Step pre-3	Step 3		Energy Density			Step pre-1	Step 1	Step pre-2	Step 2	Step pre-3	Step 3
											(AM, Theo. DC and CV)	(AM, prac. DC and CV)	(With Elyte)	(With Elyte Excess)	(Stack level)	(Pouch Cell level)					(AM, Theo. DC and CV)	(AM, prac. DC and CV)	(With Elyte)	(With Elyte Excess)	(Stack level)	(Pouch Cell level)
		[mAh g-1]	[mAh g-1]	[g cm-3]							[Wh kg-1]	[Wh kg-1]	[Wh kg-1]	[Wh kg-1]	[Wh kg-1]	[Wh kg-1]					[Wh L-1]	[Wh L-1]	[Wh L-1]	[Wh L-1]	[Wh L-1]	[Wh L-1]
Lithium Nickel Manganese Cobalt Oxide (NMC811)	LiNi0.8Mn0.1Co0.1O2	278.948	210	4.65	-0.05	0.25		Al-gra			270	249.589	109.371	61.2202	53.5481	52.5552		Al-gra			594	556.892	164.577	82.8574	70.9411	67.121
Lithium iron phosphate	LiFePO4	200	155	3.65	-0.05	0.25		Al-PPQ			313.814	217.974	181.654	147.294	125.65	123.655		Al-PPQ			516.881	361.138	283.013	217.224	195.166	184.657
Graphite (Cathode in Dual Ion vs. Li)	C16	140	140	2.2	1.31	0.41		Al-PBQS			583.635	417.045	312.459	231.264	200.163	196.888		Al-PBQS			979.788	704.939	479.066	330.714	301.413	285.182
Graphite (Cathode in Dual Ion vs. Al)	C16	135	135	2.2	0.8	0.41		Al-TiO2			206.168	66.7077	59.9822	59.0886	54.3115	53.8742		Al-TiO2			842.088	274.029	198.022	190.113	167.755	158.721
Lithium manganese oxide	LiMn2O4	160	110	4.23	-0.05	0.25		Al-V2C			276.787	111.723	99.7538	98.1762	90.0122	89.2446		Al-V2C			1043.58	424.553	307.656	295.454	262.318	248.192
Polyphenanthraquinone	PPQ	225	170	1.6	0.1	0.25		Al-MnO2			600.01	324.031	297.724	294.141	273.398	271.435		Al-MnO2			2704.84	1470.7	1102.3	1062.38	946.255	895.299
Polybenzoquinone	PBQS	388	300	1.6	0.1	0.41		LIB-NMC			621.657	466.904	408.427	400.895	360.235	356.738		LIB-NMC			1956.79	1512.67	1090.96	1047.17	914.447	865.205
Vanadium carbide	V2C	250	125	3.9	0.05	0.25		LIB-LFP			455.216	347.107	300.971	295.088	264.118	261.457		LIB-LFP			1350.32	1045.48	754.992	724.785	646.625	611.804
Manganese oxide	MnO2	462	285	5.03	0.05	0.25		Li-DIB			457.712	453.6	195.824	175.838	152.904	149.764		Li-DIB			1006.97	997.92	325.206	286.57	182.258	172.443
Graphite	C6	371.933	360	2.2	0.128	0.25
Al metal	Al	2981	2981	2.7	-1	0
Titanium oxide	TiO2	200	110	4.23	0.05	0.25
Battery Systems (Parameters)	AM Mass Fraction Cathode	Binder Mass Fraction Cathode	Conductive Additive Mass Fraction Cathode	Active Mass Fraction Anode	Binder Mass Fraction Anode	Conductive Additive Mass Fraction Anode	Theoretical Elyte Excess Additionally to Pore Volume	Practical Elyte Excess Additionally to Pore Volume	Theoretical Ratio Elyte/ Cathode AM	Practical Ratio Elyte/ Cathode AM	Theoretical Mean Discharge Voltage	Practical Mean Discharge Voltage	Theoretical Ratio Capacity Anode/ Cathode	Practical Ratio Capacity Anode/ Cathode	Thickness Cathode	Thickness Separator	Density Elyte	Active Volume in Pouch cell	Mass Cell components	Outer Volume of Pouch cell	Mass of stack inside Pouch cell		Inactive Cell Components		Thickness	Spec. Mass	Density	Porosity
									[µL mg-1]	[µL mg-1]	[V]	[V]			[µm]	[µm]	[µm]	[mL]	[g]	[mL]	[g]				[µm]	[mg cm-2]	[g cm-3]
Al-gra	0.96	0.03	0.01	1	0	0	0	0.2			2	2	0	1.80579	200	612.962	1.2	584.08	14.663	617.323	776.105		Binder (Solef 5130)				1.8
Al-PPQ	0.9	0.05	0.05	1	0	0	0	0.2			1.5	1.4	1	1.61106	200	37.7428	1.2	584.08	14.663	617.323	908.847		Conductive Additive (Imerys C65)				2.25
Al-PBQS	0.9	0.05	0.05	1	0	0	0	0.2			1.7	1.6	1	1.5	200	36.6606	1.2	584.08	14.663	617.323	881.44		Pos. Current Collector (Al; per coated side)		7.5	2.025	2.7
Al-TiO2	0.96	0.02	0.02	1	0	0	0	0.15			1.1	0.64	1	1.5	200	15	1.2	584.08	14.663	617.323	1806.64		Neg. Current Collector (Cu; per coated side)		5	4.48	8.96
Al-V2C	0.96	0.02	0.02	1	0	0	0	0.15			1.2	0.95	1	1.5	200	15	1.2	584.08	14.663	617.323	1704.83		Liquid Electrolyte (LP57)				1.2
Al-MnO2	0.96	0.02	0.02	1	0	0	0	0.15			1.5	1.3	1	1.5	200	15	1.2	584.08	14.663	617.323	2027.81		Pos. Current Collector SS; per coated side)		7.5	2.96867
LIB-NMC	0.96	0.02	0.02	0.96	0.03	0.01	0	0.15			3.9	3.65	1	1.1	154	15	1.2	584.08	14.663	617.323	1495.92		Organic solvents in electrolyte				1.1
LIB-LFP	0.96	0.02	0.02	0.96	0.03	0.01	0	0.15			3.5	3.3	1	1.1	200	15	1.2	584.08	14.663	617.323	1440.58		Liquid Electrolyte (Dual-Ion)				1.4
Li-DIB	0.96	0.03	0.01	0.96	0.03	0.01	0	0.2	1.30089	1.56107	4.5	4.5	1	1	200	282.595	1.4	584.08	14.663	617.323	699.377		Liquid Electrolyte (Al)				1.2
																							Separator (BatPaC 2022)				0.95	0.5
																							Separator (Placke 2018)				0.95	0.8
Battery Systems (General Calculations)	Composite Cathode Density	Composite Anode Density	AM Density in Cathode Coating	Theoretical Volumetric Capacity Cathode Coating	Practical Volumetric Capacity Cathode Coating	Cathode AM Areal Mass Loading	Theoretical Cathode Area Capacity	Practical Cathode Area Capacity	Theoretical Anode Area Capacity	Practical Anode Area Capacity	Theoretical Anode AM Area Mass	Practical Anode AM Area Mass	Theoretical Anode Thickness	Practical Anode Thickness	Practical Additional Thickness (Dis-)charge Anode	Practical Additional Thickness (Dis-)charge Cathode	Total Stack Thickness with Elyte Excess	Total Stack Mass with Elyte Excess	Total Stack Volumetric Energy with Elyte Excess	Total Stack Gravimetric Energy with Elyte Excess	Number of Stack layers within Pouch cell
																							Passive components/ housing pouch cell		Width	Length	Approximate weight
	[g cm-3]	[g cm-3]	[g cm-3]	[mAh cm-3]	[mAh cm-3]	[mg cm-2]	[mAh cm-2]	[mAh cm-2]	[mAh cm-2]	[mAh cm-2]	[mg cm-2]	[mg cm-2]	[µm]	[µm]	[µm]	[µm]	[µm]	[mg cm-2]	[Wh L-1]	[Wh kg-1]					[cm]	[cm]	[g]
Al-gra	2.18591	2.7	1.2381	167.144	167.144	24.762	3.34287	3.34287	0	6.03652	0	2.025	0	7.5	4.15331	153.6	942.436	124.855	70.9411	53.5481	21.2216		Anode size		10	30
Al-PPQ	1.63265	2.7	1.10204	247.959	187.347	22.0408	4.95918	3.74694	4.95918	6.03652	1.6636	2.025	6.16147	7.5	-4.65533	18	268.782	41.7485	195.166	125.65	74.4098		Cathode size		9.8	29.8
Al-PBQS	1.63265	2.7	0.866939	336.372	260.082	17.3388	6.72744	5.20163	6.72744	7.80245	2.25677	2.61739	8.35842	9.69405	-6.4627	18	276.12	41.5792	301.413	200.163	72.4322		Packaging foil thickness [cm] and density [g cm-2]		0.0153		0.0215
Al-TiO2	4.0494	2.7	2.91557	583.113	320.712	58.3113	11.6623	6.41424	11.6623	9.62137	3.9122	3.22756	14.4896	11.9539	-7.96929	9.6	244.71	75.5847	167.755	54.3115	81.7295		Packaging foil size		11	31	14.663
Al-V2C	3.75723	2.7	2.7052	676.301	338.15	54.104	13.526	6.76301	13.526	10.1445	4.53741	3.40306	16.8052	12.6039	-8.40261	9.6	244.926	71.3776	262.318	90.0122	81.6572		Cell stacking height		2
Al-MnO2	4.7426	2.7	3.41467	1577.58	973.181	68.2934	31.5516	19.4636	31.5516	29.1954	10.5842	9.79384	39.2008	36.2735	-24.1823	9.6	267.398	92.549	946.255	273.398	74.7947		Pouch size with seam		10.1	30.1
LIB-NMC	4.41595	2.18591	3.17949	886.912	667.692	48.9641	13.6584	10.2825	13.6584	11.3107	36.7229	31.4186	233.33	199.628	22.3003	-7.392	410.423	104.185	914.447	360.235	48.7303		Sum inactive		42.9153	120.9	14.6845
LIB-LFP	3.5334	2.18591	2.54405	508.809	394.327	50.8809	10.1762	7.88654	10.1762	8.6752	27.3603	24.0978	173.842	153.113	17.1041	-9.6	402.484	98.5377	646.625	264.118	49.6915
Li-DIB	2.18591	2.18591	1.2381	173.334	173.334	24.762	3.46668	3.46668	3.46668	3.46668	9.32072	9.62968	59.2222	61.1852	7.51844	251.52	855.935	102.026	182.258	152.904	23.3663
Battery Systems (Electrolyte Calculations)	Pos. Electrode AM Area Mass	Density Separator + Elyte	Specific Mass Separator	Specific Mass Separator + Elyte	Mass of Elyte in Separator	Weight Elytes in Cathode	Practical Weight Elyte in Anode	Total Volume Elyte in Pores (A+C+S)	Resulting Elyte to AM mass ratio	Theoretical Elyte Excess Additionally to Pore Volume	Practical Elyte Excess Additionally to Pore Volume	Theoretical Ratio Needed Elyte/ Cathode AM	Practical Ratio Needed Elyte/ Cathode AM	Theoretical Total Volume Elyte per Area	Practical Total Volume Elyte per Area	Theoretical Total Mass Elyte per Area	Practical Total Mass Elyte per Area	Theoretical Total Volume Elyte Excess per Area	Practical Total Volume Elyte Excess per Area	Theoretical Thickness Elyte excess	Practical Thickness Elyte excess
																							Passive components/ housing Panasonic NCR18650B		Approximate weight
																									[g]
																							Packaging foil		0.31
																							Steel can		3.65
	[mg cm-2]	[mg cm-2]	[mg cm-2]	[mg cm-2]	[mg cm-2]	[mg cm-2]	[mg cm-2]	[µL cm-2]	[µL mg-1]			[µL mg-1]	[µL mg-1]	[µL cm-2]	[µL cm-2]	[mg cm-2]	[mg cm-2]	[µL cm-2]	[µL cm-2]	[µm]	[µm]		Insulator disk (2×),		0.13
Al-gra	24.762	1.15	11.6463	70.4906	58.8443	9.84	0	57.2369	2.31148	0	0.2	2.31148	2.77378	57.2369	68.6843	68.6843	82.4212	0	11.4474	0	114.474		positive pole/negative pole Positive pole incl. CID, PTC, and gasket		1.56
Al-PPQ	22.0408	1.15	0.717113	4.34042	3.62331	6	0	8.01942	0.363844	0	0.2	0.363844	0.436613	8.01942	9.62331	9.62331	11.548	0	1.60388	0	16.0388		Negative pole Jelly roll		0.69
Al-PBQS	17.3388	1.15	0.696551	4.21597	3.51942	9.84	0	11.1328	0.642078	0	0.2	0.642078	0.770494	11.1328	13.3594	13.3594	16.0313	0	2.22657	0	22.2657		Ni mandrels (2×, wrapped Ni foil)		0.56
Al-TiO2	58.3113	1.075	0.7125	1.6125	0.9	6	0	5.75	0.0986086	0	0.15	0.0986086	0.1134	5.75	6.6125	6.9	7.935	0	0.8625	0	8.625		Sum inactive		6.9
Al-V2C	54.104	1.075	0.7125	1.6125	0.9	6	0	5.75	0.106277	0	0.15	0.106277	0.122218	5.75	6.6125	6.9	7.935	0	0.8625	0	8.625
Al-MnO2	68.2934	1.075	0.7125	1.6125	0.9	6	0	5.75	0.0841955	0	0.15	0.0841955	0.0968248	5.75	6.6125	6.9	7.935	0	0.8625	0	8.625
LIB-NMC	48.9641	1.075	0.7125	1.6125	0.9	4.62	5.98885	9.59071	0.195872	0	0.15	0.195872	0.225253	9.59071	11.0293	11.5088	13.2352	0	1.43861	0	14.3861
LIB-LFP	50.8809	1.075	0.7125	1.6125	0.9	6	4.59338	9.57782	0.18824	0	0.15	0.18824	0.216476	9.57782	11.0145	11.4934	13.2174	0	1.43667	0	14.3667
Li-DIB	24.762	1.31	5.36931	37.02	31.6507	11.48	2.14148	32.3373	1.30592	0	0.2	1.30592	1.56711	32.3373	38.8047	45.2722	54.3266	0	6.46745	0	64.6745
Electrolyte volume and separator thickness	Practical Cathode Area Capacity	Active salt ion mass	Practical salt ion mass	Salt ion mass in anode	Salt ion mass in cathode	Separator porosity	Active Ion mass in separator	Practical Ion mass in separator	Active Electrolyte Volume in Separator	Practical Electrolyte Volume in Separator	Active Electrolyte in Separator Thickness	Practical Separator Thickness
																							Electrolyte-cathode properties		Approximate weight
																									[g]
													Mass Active Elyte in Separator	Mass Practical Elyte in Separator	Total Mass Active Elyte	Total Mass Practical Elyte	Total Volume Active Elyte						Molar mass C16 (g/mol)		192
													Separator	Elyte in Separator	Electrolyte	Elyte in Pores	Active Elyte						Molar mass LiPF6 (g/mol)		152
	[mAh cm-2]	[mg cm-2]	[mg cm-2]	[mg cm-2]	[mg cm-2]		[mg cm-2]	[mg cm-2]	[µL cm-2]	[µL cm-2]	[µm]	[µm]	[mg cm-2]	[mg cm-2]	[mg cm-2]	[mg cm-2]	[µL cm-2]						Molar mass EMIM (g/mol)		147
Al-gra	3.34287	22.1187	44.2374	0	6.33763	0.8	15.7811	37.8997	20.4185	49.0369	255.231	612.962	24.5022	58.8443	34.3422	68.6843	28.6185						Molar mass AlCl3 (g/mol)		133
Al-PPQ	3.74694	3.09903	6.19806	0	3.86441	0.8	-0.765375	2.33366	-0.990288	3.01942	-12.3786	37.7428	-1.18835	3.62331	4.81165	9.62331	4.00971						AlCl3:EMIM_Cl-ratio		2
Al-PBQS	5.20163	4.30218	8.60437	0	6.33763	0.8	-2.03544	2.26674	-2.63358	2.93285	-32.9197	36.6606	-3.16029	3.51942	6.67971	13.3594	5.56642						AlCl3-mass concentration		0.644068
Li-DIB	3.46668	19.6611	19.6611	0.930015	4.9856	0.8	13.7454	13.7454	22.6076	22.6076	282.595	282.595	31.6507	31.6507	45.2722	45.2722	32.3373						Salt concentration Li-DIB (mol/ml)		0.004
																							Capacity per AlCl3 for AlCl4 active species		0.75
																							Capacity per AlCl3 for AlCl2 active species		1.5
																							Capacity per AlCl3 for AlCl active species		6
																							Faraday's constant (Ah/mol)		26801
Electrolyte Volume Change	Active Salt Mass per Area	Practical Total Salt Mass per Area	Remaining Salt Mass per Area	Practical Total Elyte Mass per Area	Practical Total Elyte Solvent Mass per Area	Practical Total Elyte Solvent Volume per Area	Max Volume Change During Charge	Reduced Thickness Electrolyte Charged
	[mg cm-2]	[mg cm-2]	[mg cm-2]	[mg cm-2]	[mg cm-2]	[µL cm-2]		[µm]
Li-DIB	19.6611	19.6611		54.3266	34.6655	36.3988	-0.062	-24.0589
Al-gra	44.2374			82.4212	38.1838	45.8206	-0.332881	-228.637
Al-PPQ	6.19806			11.548	5.34991	6.41989	-0.332881	-32.0342
Al-PBQS	8.60437			16.0313	7.42693	8.91232	-0.332881	-44.471

## Sheet: Mass and Cost Cell
Active Materials (Costs)	Formula	Specific Cost	Reference				Inactive Cell Components
									Thickness	Spec. Mass	Density	Specific Cost	Areal cost	Reference
		[$ kg-1]							[µm]	[mg cm-2]	[g cm-3]	[$ kg-1]	[$ m-2]
Lithium Nickel Manganese Cobalt Oxide (NMC811)	LiNi0.8Mn0.1Co0.1O2	26	Batpac 2022				Binder (Solef 5130)				1.8	10		Betz 2019
Lithium Iron Phosphate	LiFePO4	10	Batpac 2022				Conductive Additive (Imerys C65)				2.25	6.8		Betz 2019
Graphite (Cathode in Dual Ion vs. Li)	C16	5	Placke 2018				Pos. Current Collector (Al; per coated side)		7.5	2.025	2.7	4.93827	0.1	Batpac 2022
Graphite (Cathode in Dual Ion vs. Al)	C16	5	Placke 2018				Neg. Current Collector (Cu; per coated side)		5	4.48	8.96	13.3929	0.6	Batpac 2022
Polyphenanthraquinone	pPQ	2	Dieterich 2018				Liquid Electrolyte (LP57)				1.2	12		Batpac 2022
Lithium manganese oxide	LiMn2O4	7.525	Susarla 2020				Pos. Current Collector Al; per coated side)		7.5	2.2265	2.96867	19.5503	0.3695
Polybenzoquinone	PBQS	2	Dieterich 2018				Pos. Current Collector Al; without coating)		7	1.89	2.7	4.93827	0.0933333
Manganese oxide	MnO2	5	Susarla 2020				Liquid Electrolyte (Dual-Ion)				1.4	19.1		Placke 2018
Vanadium carbide	V2C	15.4425					Liquid Electrolyte (Al)			Porosity	1.2	2.34944
Graphite	C6	10	Batpac 2022				Separator 15 µm		15	0.5	0.95		0.2
Titanium oxide	TiO2	2.2	Cuskelly 16				Separator (non-woven)		282.595	0.8	0.95	26.0741	1.4	Placke 2018
Al metal	Al	4.93827	Batpac 2022				Pouch cell foil						1
Battery Systems (Mass contents)	Cathode AM Areal Mass Loading	Binder Areal mass	Conductive Additive Areal Mass	Anode AM Areal Mass Loading	Binder Areal mass	Conductive Additive Areal Mass	Practical Total Mass Elyte per Area	Positive Current Collector Mass	Negative Current Collector Mass	Separator Thickness	Separator Mass	Total Stack Mass	Practical Cathode Area Capacity	Practical Mean Discharge Voltage	Energy per Area	Stack Specific Energy	Density Elyte
	[mg cm-2]			[mg cm-2]			[mg cm-2]	[mg cm-2]	[mg cm-2]	[µm]	[mg cm-2]	[mg cm-2]	[mAh cm-2]	[V]	[mWh cm-2]	[Wh kg-1]	[g cm-3]
Al-gra	24.762	0.773813	0.257938	2.025	0	0	82.4212	2.2265	0	612.962	11.6463	124.113	3.34287	2	6.68575	53.8683	1.2
Al-PPQ	22.0408	1.22449	1.22449	2.025	0	0	11.548	2.2265	0	37.7428	0.717113	41.0064	3.74694	1.4	5.24571	127.924	1.2
Al-PBQS	17.3388	0.963265	0.963265	2.61739	0	0	16.0313	2.2265	0	36.6606	0.696551	40.837	5.20163	1.6	8.32261	203.801	1.2
Al-TiO2	58.3113	1.21482	1.21482	3.22756	0	0	7.935	2.2265	0	15	0.7125	74.8425	6.41424	0.64	4.10512	54.8501	1.2
Al-V2C	54.104	1.12717	1.12717	3.40306	0	0	7.935	2.2265	0	15	0.7125	70.6354	6.76301	0.95	6.42486	90.958	1.2
Al-MnO2	68.2934	1.42278	1.42278	9.79384	0	0	7.935	2.2265	0	15	0.7125	91.8068	19.4636	1.3	25.3027	275.608	1.2
LIB-NMC	48.9641	1.02009	1.02009	31.4186	0.981832	0.327277	13.2352	2.025	4.48	15	0.7125	104.185	10.2825	3.65	37.531	360.235	1.2
LIB-LFP	50.8809	1.06002	1.06002	24.0978	0.753055	0.251018	13.2174	2.025	4.48	15	0.7125	98.5377	7.88654	3.3	26.0256	264.118	1.2
Li-DIB	24.762	0.773813	0.257938	9.62968	0.300927	0.100309	54.3266	2.025	4.48	282.595	5.36931	102.026	3.46668	4.5	15.6001	152.904	1.4
Battery Systems (Material costs)	Composite Cathode Cost	Composite Anode Cost	Electrolyte Cost	Positive Current Collector Cost Cost	Negative Current Collector Cost Cost	Separator Cost	Usable Energy per Area	Composite Cathode Cost	Composite Anode Cost	Electrolyte Cost	Separator Cost	Positive Current Collector Cost	Negative Current Collector Cost	Pouch cell foil cost	Total Stack Cost	Usable Energy per Pouch cell	Total Pouch cell Cost	Capacity per Pouch cell	Total pouch cell specific cost	Cathode share of total cost	Total cost relative		Passive components/ housing pouch cell		Width	Length	Approximate weight
																		Pouch Cell
																									[cm]	[cm]	[g]
																							Anode size		10	30
																							Cathode size		9.8	29.8
	[$ cm-2]	[$ cm-2]	[$ cm-2]	[$ cm-2]	[$ cm-2]	[$ cm-2]	[mWh cm-2]	[$ kWh-1]	[$ kWh-1]	[$ kWh-1]	[$ kWh-1]	[$ kWh-1]	[$ kWh-1]	[$ kWh-1]	[$ kWh-1]	[Wh]	[$ kWh-1]	[Ah]	[$/kg]	[$/kg]	[$/kg]		Packaging foil thickness [cm] and density [g cm-2]		0.0153	0	0.0215	21,5 mg/cm2 for 153 um
Al-gra	0.000133302	1e-05	0.000193643	4.35287e-05	0	0.000303666	5.68288	23.4568	1.75967	34.0748	53.4352	7.65962	0	1.9364	122.323	35.22	124.259	17.61	6.69362	0.188773	5.25912		Packaging foil size		11	31	14.663	$1/m2 for 480mm W x 20 m L x 0.113 mm
Al-PPQ	6.46531e-05	1e-05	2.71312e-05	4.35287e-05	0	1.86981e-05	4.45886	14.4999	2.24273	6.08479	4.19347	9.7623	0	0.703863	37.4871	96.8939	38.1909	69.2099	4.88555	0.379669	1.61639		Cell stacking height		2	0
Al-PBQS	5.08604e-05	1.29254e-05	3.76645e-05	4.35287e-05	0	1.81619e-05	7.07422	7.18954	1.82711	5.32419	2.56734	6.15315	0	0.455755	23.5171	149.642	23.9728	93.526	4.88568	0.299904	1.01462		Pouch size with seam		10.1	30.1
Al-TiO2	0.000148694	1.59386e-05	1.86428e-05	4.35287e-05	0	1.85778e-05	3.48935	42.6136	4.56778	5.34276	5.32415	12.4747	0	0.818877	71.1419	83.2848	71.9608	130.132	3.94706	0.592178	3.04566		Sum inactive		42.9153	120.9	14.6845
Al-V2C	0.000854436	1.68052e-05	1.86428e-05	4.35287e-05	0	1.85778e-05	5.46113	156.458	3.07724	3.41372	3.40183	7.97065	0	0.523679	174.845	130.232	175.369	137.087	15.9512	0.892165	7.42228
Al-MnO2	0.00036537	4.83646e-05	1.86428e-05	4.35287e-05	0	1.85778e-05	21.5073	16.9882	2.24875	0.866811	0.86379	2.0239	0	0.145173	23.1366	469.785	23.2818	361.373	6.41665	0.729677	0.985376
LIB-NMC	0.0012902	0.00032623	0.000158822	1e-05	6e-05	1.85778e-05	31.9013	40.4436	10.2262	4.97854	0.582352	0.313466	1.8808	0.150222	58.5752	453.994	58.7254	124.382	21.155	0.68869	2.48549
LIB-LFP	0.000526618	0.000250215	0.000158609	1e-05	6e-05	1.85778e-05	22.1218	23.8054	11.3108	7.16981	0.839798	0.452044	2.71226	0.212442	46.5026	321.029	46.715	97.2814	12.3383	0.509588	1.97716
Li-DIB	0.000133302	9.99881e-05	0.00103764	1e-05	6e-05	0.00014	13.2601	10.0529	7.54055	78.2529	10.558	0.754144	4.52487	0.753715	112.437	90.4852	113.191	20.1078	17.3073	0.0888139	4.79068
Battery Systems (Mass fractions)	Cathode AM Areal Mass Loading	Anode AM Areal Mass Loading	Practical Total Mass Elyte per Area	Separator Mass	Positive Current Collector Mass	Negative Current Collector Mass	Binder Areal mass	Conductive Additive Areal Mass	Total Stack Mass with Elyte Excess	Total Stack Mass Control	Cathode AM mass fraction in Stack	Anode AM mass fraction in Stack	Electrolyte mass fraction in Stack	Separator mass fraction in Stack	Positive CC mass fraction in Stack	Negative CC mass fraction in Stack	Binder mass fraction in Stack	Conductive additive mass fraction in Stack
	[mg cm-2]	[mg cm-2]	[mg cm-2]	[mg cm-2]	[mg cm-2]	[mg cm-2]	[mg cm-2]	[mg cm-2]	[mg cm-2]	[mg cm-2]	[%]	[%]	[%]	[%]	[%]	[%]	[%]	[%]
Al-gra	24.762	2.025	82.4212	11.6463	2.2265	0	0.773813	0.257938	124.113	124.855	19.9512	1.63158	66.4083	9.38362	1.79393	0	0.623476	0.207825
Al-PPQ	22.0408	2.025	11.548	0.717113	2.2265	0	1.22449	1.22449	41.0064	41.7485	53.7497	4.93826	28.1614	1.74878	5.42964	0	2.9861	2.9861
Al-PBQS	17.3388	2.61739	16.0313	0.696551	2.2265	0	0.963265	0.963265	40.837	41.5792	42.4584	6.40936	39.2568	1.70568	5.45216	0	2.3588	2.3588
Al-TiO2	58.3113	3.22756	7.935	0.7125	2.2265	0	1.21482	1.21482	74.8425	75.5847	77.912	4.31247	10.6023	0.951999	2.97491	0	1.62317	1.62317
Al-V2C	54.104	3.40306	7.935	0.7125	2.2265	0	1.12717	1.12717	70.6354	71.3776	76.5962	4.81777	11.2337	1.0087	3.1521	0	1.59575	1.59575
Al-MnO2	68.2934	9.79384	7.935	0.7125	2.2265	0	1.42278	1.42278	91.8068	92.549	74.3882	10.6679	8.64315	0.776086	2.4252	0	1.54975	1.54975
LIB-NMC	48.9641	31.4186	13.2352	0.7125	2.025	4.48	2.00192	1.34736	104.185	104.185	46.9974	30.1567	12.7036	0.683882	1.94366	4.30006	1.92151	1.29324
LIB-LFP	50.8809	24.0978	13.2174	0.7125	2.025	4.48	1.81307	1.31104	98.5377	98.5377	51.636	24.4554	13.4135	0.723073	2.05505	4.54648	1.83998	1.33049
Li-DIB	24.762	9.62968	54.3266	5.36931	2.025	4.48	1.07474	0.358247	102.026	102.026	24.2704	9.43849	53.248	5.26271	1.9848	4.39106	1.0534	0.351134
Battery Systems (Stack thickness)	Thickness Change Cathode	Thickness Change Anode	Thickness Change Electrolyte	Cathode	Anode	Electrolyte	Separator	Positive CC	Negative CC	Expansion	Total Stack Thickness	Cathode	Anode	Electrolyte	Separator	Positive CC	Negative CC	Expansion
	[µm]	[µm]	[µm]	[µm]	[µm]	[µm]	[µm]	[µm]	[µm]	[µm]	[µm]	[%]	[%]	[%]	[%]	[%]	[%]	[%]
Al-gra	153.6	4.15331	-228.637	200	7.5	114.474	612.962	7.5	0	0	942.436	21.2216	0.79581	12.1466	65.0402	0.79581	0	0
Al-PPQ	18	-4.65533	-32.0342	200	7.5	16.0388	37.7428	7.5	0	0	268.782	74.4098	2.79037	5.96724	14.0422	2.79037	0	0
Al-PBQS	18	-6.4627	-44.471	200	9.69405	22.2657	36.6606	7.5	0	0	276.12	72.4322	3.51081	8.06376	13.277	2.71621	0	0
Al-TiO2	9.6	-7.96929	0	200	11.9539	8.625	15	7.5	0	1.63071	244.71	81.7295	4.88495	3.52459	6.12971	3.06486	0	0.666385
Al-V2C	9.6	-8.40261	0	200	12.6039	8.625	15	7.5	0	1.19739	244.926	81.6572	5.146	3.52147	6.12429	3.06215	0	0.488879
Al-MnO2	9.6	-24.1823	0	200	36.2735	8.625	15	7.5	0	0	267.398	74.7947	13.5653	3.22552	5.60961	2.8048	0	0
LIB-NMC	-7.392	22.3003	0	154	199.628	14.3861	15	7.5	5	14.9083	410.423	37.5223	48.6397	3.50518	3.65477	1.82738	1.21826	3.63242
LIB-LFP	-9.6	17.1041	0	200	153.113	14.3667	15	7.5	5	7.50409	402.484	49.6915	38.042	3.56952	3.72686	1.86343	1.24229	1.86445
Li-DIB	251.52	7.51844	-24.0589	200	61.1852	64.6745	282.595	7.5	5	234.98	855.935	23.3663	7.14835	7.55601	33.016	0.876235	0.584157	27.453
Battery Systems (Mass fractions)	Number of Stack layers within Pouch cell	Cathode Mass	Anode Mass	Separator Mass	Electrolyte Mass	Positive Current Collector Mass	Negative Current Collector Mass	Pouch cell foil Mass	Total Stack Mass with Elyte Excess	Usable Energy per Pouch cell	Capacity per Pouch cell	Cathode Mass	Anode Mass	Separator Mass	Electrolyte Mass	Positive Current Collector Mass	Negative Current Collector Mass	Pouch cell foil Mass
		[mg cm-2]	[mg cm-2]	[mg cm-2]	[mg cm-2]	[mg cm-2]	[mg cm-2]	[mg cm-2]	[mg cm-2]	[Wh]	[Ah]	[%]	[%]	[%]	[%]	[%]	[%]	[%]
Al-gra	21.2216	159.858	12.8921	74.1458	524.733	13.7989	0	14.663	800.091	35.22	17.61	19.98	1.61133	9.26717	65.5842	1.72466	0	1.83267
Al-PPQ	74.4098	532.179	45.204	16.0081	257.785	48.3833	0	14.663	914.222	96.8939	69.2099	58.2111	4.94453	1.75101	28.1972	5.29229	0	1.60388
Al-PBQS	72.4322	407.521	56.8751	15.1358	348.355	47.0974	0	14.663	889.647	149.642	93.526	45.807	6.39299	1.70133	39.1565	5.29394	0	1.64818
Al-TiO2	81.7295	1449.78	79.1362	17.4697	194.557	53.1427	0	14.663	1808.75	83.2848	130.132	80.1538	4.37518	0.965842	10.7564	2.93809	0	0.81067
Al-V2C	81.6572	1343.99	83.3652	17.4542	194.385	53.0957	0	14.663	1706.95	130.232	137.087	78.7362	4.88387	1.02254	11.3878	3.11056	0	0.859017
Al-MnO2	74.7947	1553.89	219.758	15.9874	178.049	48.6336	0	14.663	2030.98	469.785	361.373	76.5094	10.8203	0.787174	8.76663	2.39458	0	0.721965
LIB-NMC	48.7303	725.851	478.449	10.4161	193.486	28.8182	65.4935	14.663	1517.18	453.994	124.382	47.8422	31.5355	0.686544	12.753	1.89946	4.3168	0.966466
LIB-LFP	49.6915	769.144	374.204	10.6215	197.037	29.3866	66.7853	14.663	1461.84	321.029	97.2814	52.6147	25.5981	0.726586	13.4787	2.01024	4.56857	1.00305
Li-DIB	23.3663	176.014	70.3155	37.6382	380.823	13.8184	31.4043	14.663	724.676	90.4852	20.1078	24.2886	9.70303	5.1938	52.5508	1.90683	4.33356	2.02339

## Sheet: Mass and Cost System
System Components			Ref: Westlake 2017	Ref: NREL 2021			Specific Energy			Step pre-1	Step 1	Step 2	Step 3	Step 4	Step 5	Step pre-2	Step pre-3		Energy Density			Step pre-1	Step 1	Step 2	Step 3	Step 4	Step 5	Step pre-2	Step pre-3
	40 ft ISO Container	Datasheets	Weights	Costs	Costs					(AM, Theo. DC and CV)	(AM, prac. DC and CV)	(With Elyte Excess)	(Pouch Cell level)	(Pack level)	(Container level)	(With Elyte)	(Stack level)					(AM, Theo. DC and CV)	(AM, prac. DC and CV)	(With Elyte Excess)	(Pouch Cell level)	(Pack level)	(Container level)	(With Elyte)	(Stack level)		Relative loss	Volumetric energy density					Relative loss	Specific energy density
			[kg]	[$/kW]	[$/container]					[Wh kg-1]	[Wh kg-1]	[Wh kg-1]	[Wh kg-1]	[Wh kg-1]	[Wh kg-1]	[Wh kg-1]	[Wh kg-1]					[Wh L-1]	[Wh L-1]	[Wh L-1]	[Wh L-1]	[Wh L-1]	[Wh L-1]	[Wh L-1]	[Wh L-1]		Step 1 to 2	Step 1 to 3	Step 2 to 3	Step 3 to 4	Step 3 to 5		Step 1 to 2	Step 1 to 3	Step 2 to 3	Step 3 to 4	Step 3 to 5
Container Footprint (m2)	29.7436	11.9022					Al-gra			270	249.589	61.2202	52.5552	30.7194	21.2585	109.371	53.5481		Al-gra			594	556.892	82.8574	67.121	33.6721	9.8207	164.577	70.9411		0.148785	0.120528	0.810078	0.501663	0.146313	Al-gra	0.245284	0.210567	0.858462	0.584517	0.404498
Container Volume (m3)	77.0359	29.9935	3900				Al-PPQ			313.814	217.974	147.294	123.655	74.6109	52.0262	181.654	125.65		Al-PPQ			516.881	361.138	217.224	184.657	91.8331	26.7837	283.013	195.166		0.6015	0.511319	0.850073	0.497318	0.145046	Al-PPQ	0.675744	0.567294	0.83951	0.603378	0.420736
Battery Central Inverter		PCS (per kW)	0.555556	76.6523	0		Al-PBQS			583.635	417.045	231.264	196.888	111.655	77.3582	312.459	200.163		Al-PBQS			979.788	704.939	330.714	285.182	140.616	41.0115	479.066	301.413		0.469139	0.404548	0.86232	0.493075	0.143809	Al-PBQS	0.554531	0.472102	0.851353	0.567102	0.392905
Structural BOS		(kg/kW)	6200	7.89261	6431.8		Al-TiO2			206.168	66.7077	59.0886	53.8742	40.3149	30.1739	59.9822	54.3115		Al-TiO2			842.088	274.029	190.113	158.721	78.8112	22.9858	198.022	167.755		0.693768	0.579212	0.834879	0.496539	0.144819	Al-TiO2	0.885784	0.807617	0.911753	0.748315	0.56008
Electrical BOS		Cables in BOS (per Pack)	18	51.3124	127326		Al-V2C			276.787	111.723	98.1762	89.2446	65.0394	48.0737	99.7538	90.0122		Al-V2C			1043.58	424.553	295.454	248.192	121.086	35.3156	307.656	262.318		0.695917	0.584596	0.840037	0.487873	0.142291	Al-V2C	0.878748	0.798804	0.909025	0.728777	0.538674
Installation Labor & Equipment		Cables in BOS (per container)	120	33.4524	43736.8		Al-MnO2			600.01	324.031	294.141	271.435	204.044	146.732	297.724	273.398		Al-MnO2			2704.84	1470.7	1062.38	895.299	426.484	124.387	1102.3	946.255		0.722363	0.608758	0.842732	0.476359	0.138933	Al-MnO2	0.907756	0.837683	0.922805	0.751724	0.540576
Total Overhead		Electronics in BOS (per kW)	0.0536786	80.6393	299875		LIB-NMC			621.657	466.904	400.895	356.738	238.892	166.92	408.427	360.235		LIB-NMC			1956.79	1512.67	1047.17	865.205	415.809	121.273	1090.96	914.447		0.692266	0.571972	0.826232	0.48059	0.140167	LIB-NMC	0.858626	0.764052	0.889854	0.669655	0.467905
Capacity Day 1 (kWh)		Transformer (per kW)	0.744048		5000	kWh/container	LIB-LFP			455.216	347.107	295.088	261.457	174.306	123.641	300.971	264.118		LIB-LFP			1350.32	1045.48	724.785	611.804	296.507	86.4781	754.992	646.625		0.693258	0.585192	0.844118	0.484643	0.141349	LIB-LFP	0.850136	0.753247	0.886031	0.666671	0.472891
Number of Packs	42.483	17		Electrical BOS	25465.1	$/MWh	Li-DIB			457.712	453.6	175.838	149.764	79.0798	53.8504	195.824	152.904		Li-DIB			1006.97	997.92	286.57	172.443	85.1614	24.8379	325.206	182.258		0.287167	0.172803	0.60175	0.493852	0.144035	Li-DIB	0.387651	0.330167	0.851712	0.528031	0.35957
Capacity per Pack (kWh)			54.5	10.35	Yearly Operation & Maintenance
Max Volume Fraction of Packs	0.343125	0.421875		Electricity	0.03	$/kWh
Max Areal Packs Weight (kg/m2)	2400	2472.67
Battery Pack (Energy Content)	Cell Specific Energy	Cell including tabs Energy density	Pack Energy	Pack Usable Energy	Pack Voltage	Total Pack Volume	Volume of Cells	Mass of Pack (w.o. Cells)	Mass of Cells	Total mass per Pack	Pack Energy	Pack Specific Energy	Pack Energy Density	Cost of Cell materials in Pack	Cost of Purchased Items in Pack	Cost of Non-Materials in Pack	Total Cost of Pack	Cost of Cell Materials	Cost of Purchased Items in Pack	Cost of Non-Materials in Pack	Total Cost of Pack	Cell:Pack Mass-ratio	Cell:Pack Volume-ratio	Cell:Pack Cost-ratio	Total Cost of Pack per Usable Energy
	[Wh kg-1]	[Wh L-1]	[kWh]	[kWh]	[V]	[L]	[L]	[kg]	[kg]	[kg]	[kWh]	[Wh kg-1]	[Wh L-1]	[$]	[$]	[$]	[$]	[$ kWh-1]	[$ kWh-1]	[$ kWh-1]	[$ kWh-1]				[$ kWh-1]
Al-gra	52.5552	52.4616	411.175	349.499	984	12409.3	7964.84	5651.44	7950.65	13602.1	417.848	30.7194	33.6721	43428.3	21695.3	23896.8	89020.4	103.933	51.9215	57.1903	213.045	0.584517	0.641844	0.487847	250.641
Al-PPQ	123.655	144.327	419.2	349.481	1008	4484.75	2853.58	2189.34	3330.62	5519.96	411.849	74.6109	91.8331	13347	9842.75	19460.9	42650.7	32.4075	23.899	47.2526	103.559	0.603378	0.636284	0.312938	121.834
Al-PBQS	196.888	222.897	421	349.652	960	2933.84	1850.83	1599.47	2095.33	3694.8	412.544	111.655	140.616	8382.14	7614.59	14349.2	30346	20.3182	18.4576	34.7822	73.558	0.567102	0.630855	0.27622	86.5389
Al-TiO2	53.8742	124.056	441	347.98	960	5213.68	3312.19	2565.22	7626.96	10192.2	410.897	40.3149	78.8112	25041	13655.9	28008.4	66705.2	60.9422	33.2343	68.1641	162.341	0.748315	0.635288	0.375397	190.989
Al-V2C	89.2446	193.986	433	349.546	902.5	3413.4	2130.65	1723.59	4631.27	6354.85	413.316	65.0394	121.086	61299.4	9442.48	22622.9	93364.7	148.311	22.8457	54.735	225.892	0.728777	0.6242	0.656558	265.755
Al-MnO2	271.435	699.763	458.5	347.916	1007.5	967.223	589.492	501.926	1519.72	2021.64	412.505	204.044	426.484	8100.11	4725.49	10911.5	23737.1	19.6364	11.4556	26.4517	57.5437	0.751724	0.609468	0.341243	67.6985
LIB-NMC	356.738	676.241	420	350.739	963.6	994.609	611.567	571.889	1159.3	1731.19	413.567	238.892	415.809	20597.3	3255.02	10164.8	34017.2	49.804	7.87059	24.5785	82.2531	0.669655	0.614882	0.605497	96.7683
LIB-LFP	261.457	478.184	418	350.471	910.8	1392.07	863.177	789.326	1578.68	2368.01	412.758	174.306	296.507	16372.3	4023.23	11071.3	31466.8	39.6655	9.74719	26.8228	76.2355	0.666671	0.620067	0.520302	89.6889
Li-DIB	149.764	134.781	414	350.287	1008	4835.84	3055.52	2457.89	2749.85	5207.74	411.827	79.0798	85.1614	39649.2	9989.44	15582.4	65221.1	96.2764	24.2564	37.8373	158.37	0.528031	0.63185	0.607921	186.318
Battery Container (Energy Content)	Volume-Limited Number of Packs per Container	Mass-Limited Number of Packs per Container	Number of Packs per Container	Installed Energy per Container	Usable Energy per Container	E:P-ratio	Inverter Power	Mass of Structural BOS	Mass of Cu in Electrical BOS	Mass of Electronics in Electrical BOS	Mass of transformer in Electrical BOS	Mass of Packs (w.o. Cells)	Mass of Cells	Mass of PCS	Total mass	Battery Container Specific Energy	Battery Container Energy Density	Cell:Container Mass-ratio	Cell:Container Volume-ratio
			0	[MWh]	[MWh]		[MW]	[kg]	[kg]	[kg]	[kg]	[kg]	[kg]	[kg]	[kg]	[Wh kg-1]	[Wh L-1]
Al-gra	2.13009	5.24807	2.13009	0.890055	0.756547	4	0.189137	6200	158.342	10.1526	140.727	12038.1	16935.6	105.076	35588	21.2585	9.8207	0.47588	0.187198
Al-PPQ	5.89397	12.9321	5.89397	2.42742	2.06331	4	0.515827	6200	226.503	27.6889	383.8	12903.9	19630.6	286.571	39659	52.0262	26.7837	0.494984	0.185576
Al-PBQS	9.00969	19.3203	9.00969	3.7169	3.15936	4	0.78984	6200	282.804	42.3975	587.679	14410.7	18878.3	438.8	40840.7	77.3582	41.0115	0.462242	0.183993
Al-TiO2	5.06993	7.00387	5.06993	2.08321	1.77073	4	0.442683	6200	211.612	23.7626	329.377	13005.5	38668.1	245.935	58684.2	30.1739	22.9858	0.658918	0.185286
Al-V2C	7.74389	11.2331	7.74389	3.20067	2.72057	4	0.680143	6200	259.933	36.5091	506.059	13347.2	35864	377.857	56591.6	48.0737	35.3156	0.633734	0.182052
Al-MnO2	27.3287	35.3102	27.3287	11.2732	9.58225	4	2.39556	6200	613.828	128.59	1782.41	13717	41531.9	1330.87	65304.6	146.732	124.387	0.635972	0.177755
LIB-NMC	26.5763	41.2344	26.5763	10.9911	9.34241	4	2.3356	6200	600.236	125.372	1737.8	15198.7	30809.9	1297.56	55969.5	166.92	121.273	0.550476	0.179334
LIB-LFP	18.9883	30.1454	18.9883	7.83755	6.66192	4	1.66548	6200	463.117	89.4006	1239.2	14987.9	29976.5	925.267	53881.4	123.641	86.4781	0.556342	0.180847
Li-DIB	5.46606	13.7074	5.46606	2.25107	1.91341	4	0.478353	6200	218.771	25.6773	355.917	13435	15030.8	265.751	35531.9	53.8504	24.8379	0.423023	0.184283
60 MW Systems (Costs)	System Power	E:P-ratio	System Usable Energy	Number of Battery Containers	Cost of Structural BOS	Cost of Electrical BOS	Cost of Packs (w.o. Cell Materials)	Cost of Cell Materials	Installation costs	Power Conversion Costs	Overhead costs	Total System Costs	Cost of Structural BOS	Cost of Electrical BOS	Cost of Packs (w.o. Cell Materials)	Cost of Cell Materials	Installation costs	Power Conversion Costs	Overhead costs	Total System Costs	Cell material:System cost-ratio
	[MW]		[MWh]		[$]	[$]	[$]	[$]	[$]	[$]	[$]	[$]	[$ kWh-1]	[$ kWh-1]	[$ kWh-1]	[$ kWh-1]	[$ kWh-1]	[$ kWh-1]	[$ kWh-1]	[$ kWh-1]
Al-gra	60	4	240	317.231	2.51392e+06	9.19037e+06	3.0808e+07	2.93459e+07	1.58818e+07	4.59914e+06	2.44113e+07	1.1675e+08	10.4747	38.2932	128.367	122.275	66.1742	19.1631	101.714	486.46	0.251356
Al-PPQ	60	4	240	116.318	1.22169e+06	9.19037e+06	2.00899e+07	9.15036e+06	7.09452e+06	4.59914e+06	1.44971e+07	6.5843e+07	5.09038	38.2932	83.7078	38.1265	29.5605	19.1631	60.4045	274.346	0.138972
Al-PBQS	60	4	240	75.9647	962147	9.19037e+06	1.50324e+07	5.73689e+06	5.3296e+06	4.59914e+06	1.21315e+07	5.29821e+07	4.00895	38.2932	62.6351	23.9037	22.2067	19.1631	50.5478	220.759	0.10828
Al-TiO2	60	4	240	135.537	1.34531e+06	9.19037e+06	2.86301e+07	1.72072e+07	7.93511e+06	4.59914e+06	1.77029e+07	8.66102e+07	5.60544	38.2932	119.292	71.6967	33.0629	19.1631	73.762	360.876	0.198674
Al-V2C	60	4	240	88.2168	1.04095e+06	9.19037e+06	2.19051e+07	4.18761e+07	5.86547e+06	4.59914e+06	1.95425e+07	1.0402e+08	4.33729	38.2932	91.2714	174.484	24.4394	19.1631	81.4273	433.415	0.402578
Al-MnO2	60	4	240	25.0463	634650	9.19037e+06	1.07032e+07	5.5444e+06	3.10259e+06	4.59914e+06	1.01672e+07	4.39416e+07	2.64437	38.2932	44.5968	23.1017	12.9275	19.1631	42.3632	183.09	0.126177
LIB-NMC	60	4	240	25.6893	638785	9.19037e+06	9.16209e+06	1.40623e+07	3.13072e+06	4.59914e+06	1.13372e+07	5.21206e+07	2.66161	38.2932	38.1754	58.593	13.0446	19.1631	47.2382	217.169	0.269803
LIB-LFP	60	4	240	36.0257	705267	9.19037e+06	1.03257e+07	1.11997e+07	3.58279e+06	4.59914e+06	1.13028e+07	5.09057e+07	2.93861	38.2932	43.0235	46.6653	14.9283	19.1631	47.0951	212.107	0.220008
Li-DIB	60	4	240	125.431	1.2803e+06	9.19037e+06	1.75323e+07	2.71839e+07	7.49308e+06	4.59914e+06	1.7276e+07	8.45551e+07	5.33459	38.2932	73.0514	113.266	31.2211	19.1631	71.9833	352.313	0.321494
60 MW Systems (Overhead Costs)	Sales tax	EPC Overhead	Permitting and interconnection fee	Contingency	Developer Overhead	EPC/Developer net profit	Total Overhead costs
	[MW]	[$]	[$]	[$]	[$]	[$]	[$]
Al-gra	4.61696e+06	6.45293e+06	2160000	3.10227e+06	2.77018e+06	5.30896e+06	2.44113e+07
Al-PPQ	2.5673e+06	3.55494e+06	2160000	1.72405e+06	1.54038e+06	2.95043e+06	1.44971e+07
Al-PBQS	2.04253e+06	2.97288e+06	2160000	1.37598e+06	1.22552e+06	2.35458e+06	1.21315e+07
Al-TiO2	3.44536e+06	3.83216e+06	2160000	2.28554e+06	2.06722e+06	3.9126e+06	1.77029e+07
Al-V2C	4.22386e+06	3.1496e+06	2160000	2.75552e+06	2.53431e+06	4.71925e+06	1.95425e+07
Al-MnO2	1.68872e+06	2.23842e+06	2160000	1.13105e+06	1.01323e+06	1.93574e+06	1.01672e+07
LIB-NMC	2.03917e+06	2.2477e+06	2160000	1.35211e+06	1.2235e+06	2.31469e+06	1.13372e+07
LIB-LFP	1.98015e+06	2.39679e+06	2160000	1.3194e+06	1.18809e+06	2.2584e+06	1.13028e+07
Li-DIB	3.36396e+06	3.68638e+06	2160000	2.22988e+06	2.01837e+06	3.81739e+06	1.7276e+07
60 MW Systems (LCOS)	System Life-time	Number of cycles	Cell-level Energy efficiency	PCS efficiency (AC-DC or DC-AC)	Electrical BOS efficiency (AC-DC or DC-AC)	System-level efficiency (AC-DC-AC)	Discharged Energy per cycle	Charged Energy per cycle	Charged Enery over life-time	Cost of Discharged Energy	Cost of Operation	OPEX	CAPEX	OPEX	CAPEX	LCOS	Error-bars OPEX	Extra OPEX
	[years]		[%]	[%]	[%]	[%]	[MWh]	[MWh]	[MWh]	[$/kWh]	[$]	[$]	[$]	[$ cycle-1 kWh-1]	[$ cycle-1 kWh-1]	[$ cycle-1 kWh-1]	[$]	[$ cycle-1 kWh-1]
Al-gra	20	7300	0.9	0.98	0.98	0.830131	240	289.111	2.11051e+06	0.0361389	12420000	7.57353e+07	1.1675e+08	0.0432279	0.0666384	0.109866	3.16576e+07	0.0180694
Al-PPQ	20	7300	0.9	0.98	0.98	0.830131	240	289.111	2.11051e+06	0.0361389	12420000	7.57353e+07	6.5843e+07	0.0432279	0.0375816	0.0808095	3.16576e+07	0.0180694
Al-PBQS	20	7300	0.9	0.98	0.98	0.830131	240	289.111	2.11051e+06	0.0361389	12420000	7.57353e+07	5.29821e+07	0.0432279	0.0302409	0.0734688	3.16576e+07	0.0180694
Al-TiO2	20	7300	0.4	0.98	0.98	0.368947	240	650.499	4.74865e+06	0.0813124	12420000	1.54879e+08	8.66102e+07	0.0884015	0.049435	0.137837	7.12297e+07	0.0406562
Al-V2C	20	7300	0.65	0.98	0.98	0.599539	240	400.307	2.92224e+06	0.0500384	12420000	1.00087e+08	1.0402e+08	0.0571275	0.059372	0.116499	4.38337e+07	0.0250192
Al-MnO2	20	7300	0.7	0.98	0.98	0.645658	240	371.714	2.71351e+06	0.0464642	12420000	9.38254e+07	4.39416e+07	0.0535533	0.0250808	0.0786341	4.07027e+07	0.0232321
LIB-NMC	20	7300	0.94	0.98	0.98	0.867026	240	276.808	2.0207e+06	0.034601	12420000	7.3041e+07	5.21206e+07	0.0416901	0.0297492	0.0714393	3.03105e+07	0.0173005
LIB-LFP	20	7300	0.96	0.98	0.98	0.885473	240	271.041	1.9786e+06	0.0338802	12420000	7.17781e+07	5.09057e+07	0.0409692	0.0290558	0.070025	2.9679e+07	0.0169401
Li-DIB	20	7300	0.96	0.98	0.98	0.885473	240	271.041	1.9786e+06	0.0338802	12420000	7.17781e+07	8.45551e+07	0.0409692	0.0482621	0.0892313	2.9679e+07	0.0169401

## Sheet: Env. Impacts Cell
Elemental contents	Formula	Li content	Mn content	Ni/Fe content	Co/P content	Global warming potentials						Crustal scarcity potentials	Reference: Arvidsson 2020
							Reference	Material	GWP	Reference			CSP	Element	CSP	Alloy	CSP
									[kg CO2 eq./kg]				[kg Si eq./kg]		[kg Si eq./kg]		[kg Si eq./kg]
Lithium Nickel Cobalt Aluminum Oxide (NCA)	LiNi0.8Mn0.1Co0.1O2	0.0713405	0.056435	0.48273	0.0605469	14.8	Dai 2019	LIB-Separator	2.36429	Delgado 2019		Si	1	S	700	Stainless Steel 304L	890.126
Lithium Iron Phosphate	LiFePO4	0.0439964	0	0.353747	0.196526	11.1508		CC coating	18.1411			Al	3.4	Cl	1200	(Fe69Mn2Cr19Ni10)
Manganese oxide	MnO2	0	0.631761			6.483		AlB clean assembly	1.44	Delgado 2019		Fe	5.4	V	2000	CC Coating (Cr2N)	1850.85
Lithium manganese oxide	LiMn2O4	0.0383977	0.607502			7.31289		LIB clean assembly	2.26959	Delgado 2019		Ca	6.2	Cr	2100	Corten B Steel	53.915
Graphite (Cathode in Dual Ion vs. Al)	C16					2.46512	Delgado 2019					Mg	10	Zn	3900	(Fe97.5Mn1Cu0.4Cr0.6Ni0.4V0.1
Polyphenanthraquinone	Concentration	Density	Active material content	F/Cl material content	F/Cl material content	5.13	Iturrondobeita 2021	Cu foil	3.1	Dai 2019		Na	12	Ni	4800
Polybenzoquinone	[mol/mL]	[g cm-3]				5.13	Iturrondobeita 2021					K	19	N	5100	Part of US NaCl-production from rock salt (Ref USGS)
Liquid Electrolyte (LP57)	0.001	1.2	0.00578333	0.095	0.0258333	4.52273	Delgado 2019					Ti	67	Cu	10000		0.41
Liquid Electrolyte (Dual-Ion)	0.004	1.4	0.0198286	0.325714	0.0885714	4.52273	Delgado 2019					C	140	Co	11000	Cl (weighted CSI)	492
Liquid Electrolyte (Al)		1.2	0.130751	0.772518		2.95553						Mn	370	Li	18000	Part of global Cu-production from scrap	0.3
Graphite	C6		Metal content			4.7	Delgado 2019					F	510	Pb	26000	Cu (weighted CSI)	7000
Titanium oxide	TiO2		0.6			10.083						P	650	Mo	350000
Vanadium carbine	V2C		0.894737			13.1911
Al metal	Al	1850.85	1			7.41	Dai 2019
Cell area (Mass contents)	Cathode AM Areal Mass Loading	Binder Areal mass	Conductive Additive Areal Mass	Anode AM Areal Mass Loading	Binder Areal mass	Conductive Additive Areal Mass	Practical Total Mass Elyte per Area	Positive Current Collector Mass	Negative Current Collector Mass	Separator Thickness	Separator Mass	Total Stack Mass	Practical Cathode Area Capacity	Practical Mean Discharge Voltage	Energy per Area	Stack Specific Energy	Density Elyte	Energy per Pouch cell	Packaging foil mass per Pouch cell	Stack Specific Energy	Density Elyte
	[mg cm-2]	[mg cm-2]	[mg cm-2]	[mg cm-2]	[mg cm-2]	[mg cm-2]	[mg cm-2]	[mg cm-2]	[mg cm-2]	[µm]	[mg cm-2]	[mg cm-2]	[mAh cm-2]	[V]	[mWh cm-2]	[Wh kg-1]	[g cm-3]	[Wh]	[g]	[Wh kg-1]	[g cm-3]
Al-gra	24.762	0.773813	0.257938	2.025	0	0	82.4212	2.2265	0	612.962	11.6463	124.113	3.34287	2	6.68575	53.8683	1.2	41.4353	14.663	272.201	1.2		Passive components/ housing pouch cell		Width	Length	Approximate weight
Al-PPQ	22.0408	1.22449	1.22449	2.025	0	0	11.548	2.2265	0	37.7428	0.717113	41.0064	3.74694	1.4	5.24571	127.924	1.2	113.993	14.663	114.622	1.2
Al-PBQS	17.3388	0.963265	0.963265	2.61739	0	0	16.0313	2.2265	0	36.6606	0.696551	40.837	5.20163	1.6	8.32261	203.801	1.2	176.049	14.663	71.9478	1.2				[cm]	[cm]	[g]
Al-TiO2	58.3113	1.21482	1.21482	3.22756	0	0	7.935	2.2265	0	15	0.7125	74.8425	6.41424	0.64	4.10512	54.8501	0.2	97.9821	14.663	267.329	1.2		Anode size		10	30
Al-V2C	54.104	1.12717	1.12717	3.40306	0	0	7.935	2.2265	0	15	0.7125	70.6354	6.76301	0.95	6.42486	90.958	1.2	153.215	14.663	161.206	1.2		Cathode size		9.8	29.8
Al-MnO2	68.2934	1.42278	1.42278	9.79384	0	0	7.935	2.2265	0	15	0.7125	91.8068	19.4636	1.3	25.3027	275.608	1.2	552.689	14.663	53.2023	1.2		Packaging foil thickness [cm] and density [g cm-2]		0.0153	0	0.0215
LIB-NMC	48.9641	1.02009	1.02009	31.4186	0.981832	0.327277	13.2352	2.025	4.48	15	0.7125	104.185	10.2825	3.65	37.531	360.235	1.2	534.11	14.663	40.704	1.2		Packaging foil size		11	31	14.663
LIB-LFP	50.8809	1.06002	1.06002	24.0978	0.753055	0.251018	13.2174	2.025	4.48	15	0.7125	98.5377	7.88654	3.3	26.0256	264.118	1.2	377.681	14.663	55.5168	1.2		Cell stacking height		2	0
Li-DIB	24.762	0.773813	0.257938	9.62968	0.300927	0.100309	54.3266	2.025	4.48	282.595	5.36931	102.026	3.46668	4.5	15.6001	152.904	1.4	106.453	14.663	95.8971	1.4		Pouch size with seam		10.1	30.1
																							Sum inactive		42.9153	120.9	14.6845
Pouch cell (Mass per Cell)	Number of Stack layers within Pouch cell	Aluminium Anode Mass	Aluminium Current Collector Mass	Aluminium in Electrolyte	Ti/Mn mass in Cathode	Ni/Fe mass in Cathode	Co/P mass in Cathode	Li mass in Cathode	Lithium in Electrolyte	Phosphorus in Electrolyte	Chlorine/Flourine in Electrolyte	Copper Current Collector Mass	AlB Current Collector Mass	Current Collector Coating	Anode Graphite Mass	Cathode Graphite Mass	Cathode Additives Mass	Anode Additives Mass	Organic Active Material Mass	Separator Mass	Residual Electrolyte Mass	Oxygen mass in Oxide-Cathode	Packaging Foil Mass	Total Pouch cell Mass	Total Pouch cell Mass (Control)
		[g]	[g]	[g]	[g]	[g]	[g]	[g]	[g]	[g]	[g]	[g]	[g]	[g]	[g]	[g]	[g]	[g]	[g]	[g]	[g]	[g]	[g]	[g]	[g]
Al-gra	21.2216	12.8921	0	68.6092	0	0	0	0	0	0	405.366	0	11.7134	2.08548	0	153.464	6.39434	0	0	74.1458	50.7581	0	14.663	800.091	790.768
Al-PPQ	74.4098	45.204	0	33.7055	0	0	0	0	0	0	199.143	0	41.0709	7.31236	0	0	53.2179	0	478.961	16.0081	24.9358	0	14.663	914.222	923.51
Al-PBQS	72.4322	56.8751	0	45.5476	0	0	0	0	0	0	269.11	0	39.9794	7.11802	0	0	40.7521	0	366.769	15.1358	33.6968	0	14.663	889.647	896.103
Al-TiO2	81.7295	79.1362	0	25.4385	835.075	0	0	0	0	0	150.299	0	45.1111	8.03168	0	0	57.9913	0	0	17.4697	18.8197	556.716	14.663	1808.75	1821.3
Al-V2C	81.6572	83.3652	0	25.416	1154.42	0	0	0	0	0	150.166	0	45.0712	8.02457	0	0	53.7595	0	135.814	17.4542	18.8031	0	14.663	1706.95	1719.49
Al-MnO2	74.7947	219.758	0	23.28	942.421	0	0	0	0	0	137.546	0	41.2834	7.35019	0	0	62.1557	0	0	15.9874	17.2229	549.316	14.663	2030.98	2042.47
LIB-NMC	48.7303	0	28.8182	0	39.3249	336.375	42.1901	49.7113	1.11899	4.99839	18.3812	65.4935	0	0	459.311	0	29.0341	19.138	0	10.4161	168.987	229.216	14.663	1517.18	1510.58
LIB-LFP	49.6915	0	29.3866	0	0	261.199	145.111	32.486	1.13953	5.09013	18.7186	66.7853	0	0	359.236	0	30.7658	14.9682	0	10.6215	172.089	299.583	14.663	1461.84	1455.25
Li-DIB	23.3663	0	13.8184	0	0	0	0	0	7.55118	9.83793	36.1782	31.4043	0	0	67.5029	168.973	7.04055	2.81262	0	37.6382	327.256	0	14.663	724.676	714.04
Pouch cell (Mass per Energy)	Usable Energy per Pouch cell	Aluminium Anode Mass	Aluminium Current Collector Mass	Aluminium in Electrolyte	Ti/Mn mass in Cathode	Ni/Fe mass in Cathode	Co/P mass in Cathode	Li mass in Cathode	Lithium in Electrolyte	Phosphorus in Electrolyte	Chlorine/Flourine in Electrolyte	Copper Current Collector Mass	AlB Current Collector Mass	Current Collector Coating	Anode Graphite Mass	Cathode Graphite Mass	Binder Mass	Conductive Additives Mass	Organic Active Material Mass	Separator Mass	Residual Electrolyte Mass	Oxygen mass in Oxide-Cathode	Packaging Foil Mass	Total Pouch cell Mass	Total Pouch cell Mass (Control)
	[kg/kWh]	[kg/kWh]	[kg/kWh]	[kg/kWh]	[kg/kWh]	[kg/kWh]	[kg/kWh]	[kg/kWh]	[kg/kWh]	[kg/kWh]	[kg/kWh]	[kg/kWh]	[kg/kWh]	[kg/kWh]	[kg/kWh]	[kg/kWh]	[kg/kWh]	[kg/kWh]	[kg/kWh]	[kg/kWh]	[kg/kWh]	[kg/kWh]	[kg/kWh]	[kg/kWh]	[kg/kWh]
Al-gra	0.03522	366.046	0	1948.02	0	0	0	0	0	0	11509.5	0	332.578	59.2129	0	4357.3	181.554	0	0	2105.22	1441.17	0	416.326	22717	22452.2
Al-PPQ	0.0968939	466.531	0	347.86	0	0	0	0	0	0	2055.27	0	423.875	75.4678	0	0	549.239	0	4943.15	165.213	257.352	0	151.331	9435.3	9531.15
Al-PBQS	0.149642	380.075	0	304.378	0	0	0	0	0	0	1798.36	0	267.167	47.5671	0	0	272.331	0	2450.98	101.147	225.183	0	97.9874	5945.18	5988.32
Al-TiO2	0.0832848	950.187	0	305.439	10026.7	0	0	0	0	0	1804.64	0	541.648	96.4363	0	0	696.301	0	0	209.758	225.969	6684.49	176.059	21717.7	21868.4
Al-V2C	0.130232	640.126	0	195.158	8864.27	0	0	0	0	0	1153.06	0	346.082	61.6173	0	0	412.797	0	1042.85	134.024	144.381	0	112.591	13107	13203.3
Al-MnO2	0.469785	467.785	0	49.5546	2006.07	0	0	0	0	0	292.785	0	87.8771	15.6458	0	0	132.307	0	0	34.0312	36.6612	1169.29	31.2121	4323.22	4347.67
LIB-NMC	0.453994	0	63.477	0	86.6199	740.924	92.931	109.498	2.46478	11.0098	40.4877	144.261	0	0	1011.71	0	63.9525	42.1547	0	22.9432	372.224	504.888	32.2978	3341.85	3327.32
LIB-LFP	0.321029	0	91.5388	0	0	813.632	452.018	101.194	3.54963	15.8557	58.3081	208.035	0	0	1119.02	0	95.835	46.6257	0	33.086	536.056	933.198	45.6751	4553.62	4533.07
Li-DIB	0.0904852	0	152.714	0	0	0	0	0	83.4521	108.724	399.824	347.065	0	0	746.011	1867.41	77.8089	31.0838	0	415.96	3616.68	0	162.049	8008.78	7891.24
Pouch cell (CSP per Cell)	Aluminium Anode Mass	Aluminium Current Collector Mass	Aluminium in Electrolyte	V/Mn in Cathode	Ni/Fe mass in Cathode	Co/P mass in Cathode	Li mass in Cathode	Lithium in Electrolyte	Phosphorus in Electrolyte	Chlorine/Flourine in Electrolyte	Copper CC	AlB CC	Current Collector Coating	Anode Graphite	Cathode Graphite	Cathode additives	Anode Additives	Organic AM	Separator Mass	Pouch cell foil	Total CSP	Total CSP per mass
	[kg Si eq.]	[kg Si eq.]	[kg Si eq.]	[kg Si eq.]	[kg Si eq.]	[kg Si eq.]	[kg Si eq.]	[kg Si eq.]	[kg Si eq.]	[kg Si eq.]	[kg Si eq.]	[kg Si eq.]	[kg Si eq.]	[kg Si eq.]	[kg Si eq.]	[kg Si eq.]	[kg Si eq.]	[kg Si eq.]	[kg Si eq.]	[kg Si eq.]	[kg Si eq.]	[kg Si eq./kg]
Al-gra	0.0438332	0	0.233271	0	0	0	0	0	0	199.44	0	0.0398255	3.8599	0	21.485	0.895207	0	0	10.3804	0.0498542	236.377	295.438
Al-PPQ	0.153694	0	0.114599	0	0	0	0	0	0	97.9786	0	0.139641	13.5341	0	0	7.45051	0	67.0546	2.24113	0.0498542	188.667	206.369
Al-PBQS	0.193375	0	0.154862	0	0	0	0	0	0	132.402	0	0.13593	13.1744	0	0	5.70529	0	51.3476	2.11901	0.0498542	205.233	230.69
Al-TiO2	0.269063	0	0.0864908	55.95	0	0	0	0	0	73.9471	0	0.153378	14.8654	0	0	8.11878	0	0	2.44576	0.0498542	155.836	86.1567
Al-V2C	0.283442	0	0.0864143	2308.83	0	0	0	0	0	73.8816	0	0.153242	14.8523	0	0	7.52633	0	19.0139	2.44359	0.0498542	2427.07	1421.87
Al-MnO2	0.747178	0	0.079152	348.696	0	0	0	0	0	67.6726	0	0.140363	13.6041	0	0	8.7018	0	0	2.23823	0.0498542	441.879	217.569
LIB-NMC	0	0.0979817	0	14.5502	1614.6	464.091	894.803	20.1419	3.24895	9.3744	458.454	0	0	64.3036	0	4.06477	2.67932	0	1.45825	0.0498542	3551.87	2341.1
LIB-LFP	0	0.0999144	0	0	4.39361	94.3219	584.749	20.5116	3.30859	9.54646	467.497	0	0	50.293	0	4.30721	2.09554	0	1.48702	0.0498542	1242.61	850.031
Li-DIB	0	0.0469825	0	0	0	0	0	135.921	6.39465	18.4509	219.83	0	0	9.4504	23.6563	0.985677	0.393767	0	5.26935	0.0498542	420.399	580.12
Pouch cell (CSP per Energy)	Energy per Pouch cell	Cathode	Anode	Separator	Electrolyte	Positive CC	Negative CC	Pouch cell foil	Total CSP	Cu share of Total CSP	Lithium CSP
	[kg/kWh]	[kg Si eq./kWh]	[kg Si eq./kWh]	[kg Si eq./kWh]	[kg Si eq./kWh]	[kg Si eq./kWh]	[kg Si eq./kWh]	[kg Si eq./kWh]	[kg Si eq./kWh]	[kg Si eq./kWh]	[kg Si eq./kWh]
Al-gra	0.03522	635.439	1.24455	294.731	5669.31	110.725	0	1.41551	6712.87	0
Al-PPQ	0.0968939	768.935	1.5862	23.1298	1012.38	141.121	0	0.514524	1947.66	0
Al-PBQS	0.149642	381.264	1.29225	14.1606	885.83	88.9478	0	0.333157	1371.83	0
Al-TiO2	0.0832848	769.274	3.23064	29.3662	888.92	180.331	0	0.598599	1871.72	0
Al-V2C	0.130232	17786.3	2.17643	18.7633	567.97	115.221	0	0.382809	18490.8	0
Al-MnO2	0.469785	760.768	1.59047	4.76437	144.219	29.2569	0	0.106121	940.704	0
LIB-NMC	0.453994	6590.64	147.541	3.21205	72.1711	0.0979817	1009.82	0.109812	7823.59	0.129074	2015.32
LIB-LFP	0.321029	2142.4	163.19	4.63204	103.937	0.0999144	1456.25	0.155295	3870.66	0.376227	1885.38
Li-DIB	0.0904852	272.331	108.793	58.2344	1776.72	0.0469825	2429.46	0.550965	4646.13	0.522899	1502.14
Pouch cell (GWP per Cell)	Aluminium Anode Mass	Aluminium Current Collector Mass	Aluminium in Electrolyte	TiO/MnO Cathode	NMC Cathode	LFP Cathode	AlB Electrolyte	LIB Electrolyte	Negative CC	Positive CC	Anode Graphite	Cathode Graphite	Separator	Organic Cathode	Pouch cell foil	Clean assembly	Total CO2	Mass per cell	CO2 per cell mass
	[kg CO2 eq.]	[kg CO2 eq.]	[kg CO2 eq.]	[kg CO2 eq.]	[kg CO2 eq.]	[kg CO2 eq.]	[kg CO2 eq.]	[kg CO2 eq.]	[kg CO2 eq.]	[kg CO2 eq.]	[kg CO2 eq.]	[kg CO2 eq.]	[kg CO2 eq.]	[kg CO2 eq.]	[kg CO2 eq.]	[kg CO2 eq.]	[kg CO2 eq.]	[kg]	[kg CO2 eq./kg]
Al-gra	0.0955307	0	0.508394	0	0	0	1.55086	0	0	0.140083	0	0.378307	0.175302	0	0.108653	1.15213	4.10926	0.800091	5.13599
Al-PPQ	0.334961	0	0.249758	0	0	0	0.76189	0	0	0.491175	0	0	0.0378477	2.45707	0.108653	1.31648	5.75784	0.914222	6.29807
Al-PBQS	0.421444	0	0.337508	0	0	0	1.02957	0	0	0.47812	0	0	0.0357854	1.88152	0.108653	1.28109	5.5737	0.889647	6.26507
Al-TiO2	0.586399	0	0.188499	14.0334	0	0	0.575018	0	0	0.539491	0	0	0.0413033	0	0.108653	2.6046	18.6774	1.80875	10.3261
Al-V2C	0.617736	0	0.188332	17.0195	0	0	0.57451	0	0	0.539014	0	0	0.0412668	0	0.108653	2.45801	21.547	1.70695	12.6231
Al-MnO2	1.62841	0	0.172505	9.67093	0	0	0.526228	0	0	0.493715	0	0	0.0377987	0	0.108653	2.92462	15.5629	2.03098	7.66272
LIB-NMC	0	0.213543	0	0	10.3129	0	0	0.875085	0.20303	0.213543	2.15876	0	0.0246266	0	0.108653	3.44336	17.5535	1.51718	11.5698
LIB-LFP	0	0.217755	0	0	0	8.23351	0	0.891147	0.207035	0.217755	1.68841	0	0.0251124	0	0.108653	3.31778	14.9072	1.46184	10.1975
Li-DIB	0	0.102394	0	0	0	0	0	1.72236	0.0973532	0.102394	0.317264	0.416539	0.0889875	0	0.108653	1.64471	4.60066	0.724676	6.34857
Pouch cell (GWP per Energy)	Energy per Pouch cell	Cathode	Anode	Separator	Electrolyte	Positive CC	Negative CC	Pouch cell foil	Assembly	Total CSP	Cathode share of Total CSP	Electrolyte and Assembly share of Total CSP
	[kg/kWh]	[kg CO2 eq./kWh]	[kg CO2 eq./kWh]	[kg CO2 eq./kWh]	[kg CO2 eq./kWh]	[kg CO2 eq./kWh]	[kg CO2 eq./kWh]	[kg CO2 eq./kWh]	[kg CO2 eq./kWh]	[kg CO2 eq./kWh]	[kg CO2 eq./kWh]	[kg CO2 eq./kWh]
Al-gra	0.03522	10.7412	2.7124	4.97734	44.0336	3.97736	0	3.08497	32.7124	102.239	0.10506	0.750651
Al-PPQ	0.0968939	25.3584	3.45699	0.39061	7.86313	5.0692	0	1.12136	13.5868	56.8465	0.446085	0.377331
Al-PBQS	0.149642	12.5735	2.81636	0.239141	6.88024	3.1951	0	0.726087	8.56106	34.9915	0.359331	0.441287
Al-TiO2	0.0832848	168.499	7.04089	0.495929	6.90424	6.47767	0	1.30459	31.2734	221.996	0.759019	0.171975
Al-V2C	0.130232	130.685	4.74334	0.31687	4.41142	4.13886	0	0.834299	18.874	164.004	0.796842	0.141981
Al-MnO2	0.469785	20.5858	3.46628	0.0804596	1.12015	1.05094	0	0.231282	6.22543	32.7604	0.628376	0.224221
LIB-NMC	0.453994	22.7159	4.75505	0.0542444	1.92753	0.470364	0.447208	0.239327	7.5846	38.1943	0.594747	0.249046
LIB-LFP	0.321029	25.6473	5.25937	0.0782247	2.77591	0.678303	0.64491	0.338452	10.3348	45.7573	0.560507	0.286528
Li-DIB	0.0904852	4.60339	3.50625	0.983449	19.0347	1.13161	1.0759	1.20078	18.1766	49.7127	0.0925999	0.748527

## Sheet: Env. Impacts System
Global warming potentials	Formula	Li content	GWP			Material	GWP	Reference				Crustal scarcity potentials	Reference: Arvidsson 2020
													CSP	Element	CSP	Alloy	CSP
			[kg Si eq./kg]										[kg Si eq./kg]		[kg Si eq./kg]		[kg Si eq./kg]
Lithium Nickel Cobalt Aluminum Oxide (NCA)	LiNi0.8Mn0.1Co0.1O2	0.0713405	14.8			LIB-Separator	2.36429					Si	1	S	700	Stainless Steel 304L	890.126
Lithium Iron Phosphate	LiFePO4	0.0439964	11.1508			Cu	3.1	Dai 2019				Al	3.4	Cl	1200	(Fe69Mn2Cr19Ni10)
Manganese oxide	MnO4	0	17.9217			Steel	2.68	Dai 2019				Fe	5.4	V	2000	CC Coating (Cr2N)	1850.85
Graphite (Cathode in Dual Ion vs. Al)	C16		2.46512									Ca	6.2	Cr	2100	Corten B Steel	53.915
Polyphenanthraquinone	Concentration	Density	2.46512									Mg	10	Zn	3900	(Fe97.5Mn1Cu0.4Cr0.6Ni0.4V0.1
Polybenzoquinone	[mol/mL]	[g cm-3]	2.46512			Transformer	2.78067					Na	12	Ni	4800	Electronics	6750.2
Liquid Electrolyte (LP57)	0.001	1.2	4.52273			Electronics	26.48	Dai 2019				K	19	N	5100	Transformer	361.849
Liquid Electrolyte (Dual-Ion)	0.004	1.4	4.52273			Coolant	1.75	Dai 2019				Ti	67	Cu	10000	Part of US NaCl-production from rock salt (Ref USGS)	0.41
Liquid Electrolyte (Al)		1.2	2.7			Insulation	1.9	Dai 2019				C	140	Co	11000	Cl (weighted CSI)	492
Graphite	C6		4.7									Mn	370	Li	18000	Part of global Cu-production from scrap	0.3
Lithium titanate	Li4Ti5O12					AlB clean assembly	1.44					F	510	Pb	26000	Cu (weighted CSI)	7000
Al metal	Al	1850.85	7.41			LIB clean assembly	2.26959					P	650	Mo	350000
Battery Pack (Mass Contents)	Number of Pouch cells per Pack	Cells	Aluminium in Cell terminals	Aluminium in Thermal Conductors	Aluminium in Pack Jacket	Copper in Cell Terminals	Copper in Cell interconnects	Copper in rest of Pack	Steel in Pack	Stainless steel in Pack	Electronics in BMS	Total Pack Mass	Total Pack Mass (Control)	Residual Pack mass (mainly coolants)
		[kg]	[kg]	[kg]	[kg]	[kg]	[kg]	[kg]	[kg]	[kg]	[kg]	[kg]	[kg]	[kg]
Al-gra	9840	7950.65	166.772	482.878	1008.62	0	278.343	0.839918	2469.84	450.138	2.724	12810.8	13602.1	791.28
Al-PPQ	3600	3330.62	60.4519	173.729	369.055	0	93.8263	0.961713	1024.66	218.123	2.724	5274.16	5519.96	245.8
Al-PBQS	2400	2095.33	39.8155	113.263	244.911	0	60.6735	1.1578	760.716	179.548	2.724	3498.14	3694.8	196.664
Al-TiO2	4212	7626.96	39.8155	202.549	415.522	0	101.374	2.24387	1169.87	254.767	2.724	9815.83	10192.2	376.347
Al-V2C	2850	4631.27	46.6383	130.635	281.995	0	68.5843	6.88256	790.681	168.108	2.724	6127.52	6354.85	227.337
Al-MnO2	775	1519.72	12.7793	36.9543	81.8504	0	10.8864	2.85092	235.184	47.8275	2.724	1950.77	2021.64	70.8693
LIB-NMC	792	1159.3	6.57332	37.676	87.0422	14.5424	18.9859	3.07594	277.379	64.0687	2.724	1671.37	1731.19	59.8217
LIB-LFP	1104	1578.68	9.21332	52.9213	120.425	20.3831	27.8692	4.17612	381.313	89.3082	2.724	2287.02	2368.01	80.9922
Li-DIB	4032	2749.85	33.1884	186.329	404.929	73.4242	113.567	0.955732	1124.94	238.162	2.724	4928.07	5207.74	279.675
Battery Pack (Mass per Energy)	Energy per Pack	Cells	Aluminium in Pack	Copper in Pack	Steel in Pack	Stainless steel in Pack	Electronics in Pack	Pack Mass per Energy
	[kg/kWh]	[kg/kWh]	[kg/kWh]	[kg/kWh]	[kg/kWh]	[kg/kWh]	[kg/kWh]	[kg/kWh]
Al-gra	417.848	19.0276	3.9686	0.668146	5.91087	1.07728	0.00651912	30.659
Al-PPQ	411.849	8.087	1.4647	0.230152	2.48796	0.529619	0.00661408	12.8061
Al-PBQS	412.544	5.07904	0.964718	0.149878	1.84396	0.435222	0.00660293	8.47943
Al-TiO2	410.897	18.5617	1.6011	0.252175	2.84713	0.620026	0.00662941	23.8888
Al-V2C	413.316	11.2052	1.11118	0.182589	1.91302	0.40673	0.0065906	14.8253
Al-MnO2	412.505	3.68412	0.318988	0.0333022	0.570135	0.115944	0.00660356	4.72909
LIB-NMC	413.567	2.80317	0.317461	0.0885087	0.670699	0.154917	0.0065866	4.04135
LIB-LFP	412.758	3.82472	0.442293	0.12702	0.923818	0.21637	0.00659951	5.54082
Li-DIB	411.827	6.67719	1.51628	0.456373	2.73158	0.578306	0.00661443	11.9663
Battery Container (Mass Contents)	Number of Packs per container	Cells	Aluminium in Pack	Copper in Pack	Copper Electronic BOS	Steel	Stainless Steel	Electronics in Pack	Electronics in PCS Inverter and Electrical BOS	Transformer	Total Battery Container Mass	Total Battery Container Mass (Control)	Residual Pack M	Residual Battery Container Mass
		[kg]	[kg]	[kg]	[kg]	[kg]	[kg]	[kg]	[kg]	[kg]	[kg]	[kg]	[kg]	[kg]
Al-gra	2.13009	16935.6	3532.27	594.687	158.342	11461	958.837	5.80237	115.229	140.727	33902.5	35588	1685.5	1685.5
Al-PPQ	5.89397	19630.6	3555.45	558.677	226.091	12239.3	1285.61	16.0552	314.26	383.8	38209.9	39659	1449.15	1448.74
Al-PBQS	9.00969	18878.3	3585.76	557.081	282.174	13053.8	1617.67	24.5424	481.198	587.679	39068.2	40840.7	1772.51	1771.88
Al-TiO2	5.06993	38668.1	3335.43	525.336	211.259	12131.2	1291.65	13.8105	269.698	329.377	56775.8	58684.2	1908.41	1908.05
Al-V2C	7.74389	35864	3556.52	584.407	259.39	12322.9	1301.81	21.0943	414.366	506.059	54830.6	56591.6	1761.02	1760.47
Al-MnO2	27.3287	41531.9	3596.02	375.424	611.917	12627.3	1307.07	74.4435	1459.46	1782.41	63365.9	65304.6	1938.68	1936.77
LIB-NMC	26.5763	30809.9	3489.24	972.805	598.373	13571.7	1702.71	72.3938	1422.93	1737.8	54377.8	55969.5	1591.7	1589.84
LIB-LFP	18.9883	29976.5	3466.49	995.523	461.789	13440.5	1695.81	51.724	1014.67	1239.2	52342.1	53881.4	1539.23	1537.9
Li-DIB	5.46606	15030.8	3413.26	1027.33	218.389	12349	1301.81	14.8895	291.429	355.917	34002.8	35531.9	1529.1	1528.72
Battery Container (Mass per Energy)	Usable Energy per Battery Container	Cells	Aluminium in Pack	Copper in Pack	Copper Electronic BOS	Steel	Stainless Steel	Electronics in Pack	Electronics in PCS Inverter and Electrical BOS	Transformer	Total Battery Container Mass	Total Battery Container Mass (Control)
	[kg/kWh]	[kg/kWh]	[kg/kWh]	[kg/kWh]	[kg/kWh]	[kg/kWh]	[kg/kWh]	[kg/kWh]	[kg/kWh]	[kg/kWh]	[kg/kWh]	[kg/kWh]
Al-gra	756.547	22.3854	4.66894	0.786054	0.209295	15.1491	1.26739	0.00766955	0.152309	0.186012	44.8122	47.0401
Al-PPQ	2063.31	9.51412	1.72318	0.270767	0.109577	5.9319	0.623081	0.00778127	0.152309	0.186012	18.5187	19.2211
Al-PBQS	3159.36	5.97534	1.13496	0.176327	0.0893138	4.13179	0.512026	0.00776815	0.152309	0.186012	12.3659	12.9269
Al-TiO2	1770.73	21.8374	1.88365	0.296677	0.119306	6.85094	0.729443	0.0077993	0.152309	0.186012	32.0635	33.1412
Al-V2C	2720.57	13.1825	1.30727	0.21481	0.095344	4.52954	0.478505	0.00775365	0.152309	0.186012	20.1541	20.8014
Al-MnO2	9582.25	4.33426	0.37528	0.0391791	0.0638595	1.31778	0.136405	0.00776889	0.152309	0.186012	6.61285	6.81517
LIB-NMC	9342.41	3.29785	0.373484	0.104128	0.0640491	1.4527	0.182256	0.00774894	0.152309	0.186012	5.82054	5.99091
LIB-LFP	6661.92	4.49967	0.520345	0.149435	0.0693177	2.01751	0.254552	0.00776413	0.152309	0.186012	7.85692	8.08796
Li-DIB	1913.41	7.85552	1.78386	0.53691	0.114136	6.45391	0.68036	0.00778168	0.152309	0.186012	17.7708	18.57
Battery Pack (CDP per Energy)	Usable Energy per Pack	Cells CDP per Usable Energy	Aluminium in Pack	Copper in Pack	Steel in Pack	Stainless Steel in Pack	Electronics in Pack	Electronics in Container
	[kg/kWh]	[kg/kWh]	[kg/kWh]	[kg/kWh]	[kg/kWh]	[kg/kWh]	[kg/kWh]	[kg/kWh]
Al-gra	355.171	6712.87	13.4932	4677.02	318.684	958.913	51.771	1095.42
Al-PPQ	350.071	1947.66	4.97999	1611.07	134.139	471.428	52.5252	1095.42
Al-PBQS	350.663	1371.83	3.28004	1049.15	99.4172	387.402	52.4366	1095.42
Al-TiO2	349.262	1871.72	5.44374	1765.23	153.503	551.901	52.6469	1095.42
Al-V2C	351.319	18490.8	3.77802	1278.12	103.14	362.041	52.3387	1095.42
Al-MnO2	350.629	940.704	1.08456	233.115	30.7389	103.205	52.4416	1095.42
LIB-NMC	351.532	7823.59	1.07937	619.561	36.1607	137.896	52.3069	1095.42
LIB-LFP	350.844	3870.66	1.5038	889.138	49.8077	192.596	52.4095	1095.42
Li-DIB	350.053	4646.13	5.15537	3194.61	147.273	514.765	52.5279	1095.42
Battery Container (CDP per Energy)	Cells CDP per Useable Energy	Aluminium in Pack	Copper in Pack	Electronics	Steel	Copper in Electrical BOS	Total CDP	Cu in Cells part of total CSP	Cu in Packs part of total CSP	Cu in Cells part of total CSP	Cu part of total CSP	Electronics part of total CSP	Cu and Electronics part of total CSP
	[kg/kWh]	[kg/kWh]	[kg/kWh]	[kg/kWh]	[kg/kWh]	[kg/kWh]	[kg/kWh]	[kg/kWh]	[kg/kWh]	[kg/kWh]	[kg/kWh]	[kg/kWh]	[kg/kWh]
Al-gra	6712.87	15.8744	5502.38	1147.19	1944.9	1465.07	16788.3	0	0.327751	0.0872673	0.415019	0.068333	0.483351
Al-PPQ	1947.66	5.85881	1895.37	1147.95	874.439	767.04	6638.32	0	0.28552	0.115547	0.401067	0.172927	0.573994
Al-PBQS	1371.83	3.85887	1234.29	1147.86	678.533	625.196	5061.56	0	0.243855	0.123518	0.367374	0.226779	0.594153
Al-TiO2	1871.72	6.4044	2076.74	1148.07	1018.66	835.141	6956.74	0	0.298522	0.120048	0.41857	0.16503	0.5836
Al-V2C	18490.8	4.44472	1503.67	1147.76	670.14	667.408	22484.3	0	0.0668767	0.0296833	0.09656	0.0510473	0.147607
Al-MnO2	940.704	1.27595	274.253	1147.86	192.465	447.016	3003.58	0	0.0913089	0.148828	0.240137	0.382165	0.622302
LIB-NMC	7823.59	1.26985	728.895	1147.73	240.553	448.344	10390.4	0.0971884	0.0701509	0.0431499	0.210489	0.110461	0.32095
LIB-LFP	3870.66	1.76917	1046.04	1147.83	335.358	485.224	6886.89	0.211452	0.151889	0.0704562	0.433798	0.166669	0.600467
Li-DIB	4646.13	6.06514	3758.37	1147.95	953.569	798.952	11311	0.214786	0.332274	0.0706348	0.617696	0.101489	0.719185
Battery Container (GWP per Energy)	Cells	Aluminium in Pack	Copper in Pack	Electronics	Steel	Copper in Electrical BOS	Total GWP	Al in Packs part of total GWP	Steel part of total GWP	Al and Steel in BESS part of total GWP
	[kg/kWh]	[kg/kWh]	[kg/kWh]	[kg/kWh]	[kg/kWh]	[kg/kWh]	[kg/kWh]	[kg/kWh]	[kg/kWh]	[kg/kWh]
Al-gra	102.239	34.5968	2.43677	4.75346	43.9962	0.648816	188.671	0.183371	0.233189	0.41656
Al-PPQ	56.8465	12.7688	0.839379	4.75642	17.5673	0.339689	93.1181	0.137124	0.188657	0.325781
Al-PBQS	34.9915	8.41007	0.546614	4.75607	12.4454	0.276873	61.4266	0.136913	0.202607	0.339519
Al-TiO2	221.996	13.9578	0.919699	4.75689	20.3154	0.369848	262.316	0.05321	0.0774464	0.130656
Al-V2C	164.004	9.68688	0.665912	4.75568	13.4216	0.295566	192.83	0.0502354	0.0696032	0.119839
Al-MnO2	32.7604	2.78082	0.121455	4.75609	3.89721	0.197964	44.5139	0.0624709	0.0875503	0.150021
LIB-NMC	38.1943	2.76752	0.322796	4.75556	4.38168	0.198552	50.6204	0.054672	0.0865596	0.141232
LIB-LFP	45.7573	3.85575	0.463248	4.75596	6.08912	0.214885	61.1363	0.0630682	0.0995992	0.162667
Li-DIB	49.7127	13.2184	1.66442	4.75643	19.1199	0.353822	88.8257	0.148813	0.215251	0.364065

## Sheet: Material Costs and GWP
Electrolyte for AlBs								Coating of Cr2N for Current Collector in AlBs								GWPs																					CSP of Inverter							CSP of transformer
SI in Elia 2021								Based on Merlo 2021 for Cr sputtering				Adjusted for compatibility with BatPac				SI in Delgado 2019										AlB-electrolyte						V2C-cathode					Nordelöf 2019	Inverter	10900	g				ABB 2021	Safeplus Air	450	kg
Table S1 Cost evaluation of the 1 Ah AGDI (1.5 V) cell developer at Albufera					1.5	Wh
								Process parameters								Al-gra		kg in 18650 cell		Kg CO2-eq per 18650 cell		Kg CO2-eq per kg battery material				Material	GWP (CO2 eq./kg)		Reference	mass (g/mol)		MAX materials		Reference	Cuskelly 2016		Material	mass (g)	Share	CPI (kg Si eq./kg)				Material	mass (kg)	Share (%)	CPI (kg Si eq./kg)
Al-C cost 1 Ah/ 1.5 V	Cost weight (%)	Part cost	kg					Substrate	Steel cylinder in closed chamber			Steel roll inside closed chamber				Anode	Al-foil	0.003		0.0265		8.83333				AlCl3	1.052		Ecocosts 2012	133		Inputs	Mol	kg/mol	kg		Brass	710						Brass	6.075	1.35
Cathode active mass	17.41	0.0264632						Width (cm)	80	cm		150	cm			Separator	PAN-based	0.0042		0.0164		3.90476				BMIM_Cl	6.4		Righi 2011	147		V2O5	3	182	1.59649		Cu in brass	426						Cu in brass	3.645	0.81
Anode active mass	5.52	0.0083904						Diameter (cm)	40	cm		40	cm			Cathode	Graphite	0.0043		0.0106		2.46512										Al	13	27	1.02632		Zn in brass	284						Zn in brass	2.43	0.54	3900	9477
Electrolyte mixture	38.11	0.0579272						Deposited area	1.00528	m2		1.8849	m2			Housing	Cr-Steel	0.0085		0.0594		6.98824				r	2	GWP				C	3	12	0.105263		Al	6350	0.582569	3.4	1.98073			Al	37.35	8.3	3.4	126.99
Separator	0.53	0.0008056						Sputter target area	80	% of substrate		80	% of substrate			Electrolyte	AlCl3 in [EMI][TFSI]	0.01		0.101		10.1				AlCl in 1 kg electrolyte	0.644068	0.677559				Outputs					Cu total	2736	0.251009	10000	2510.09			Cu total	9.72	2.16	10000	97200
Electrical tabs	5.58	0.0084816						Power density	6.8	W/cm2		0.32	W/cm2						Clean production	0.0432		1.44	kg CO2e/kg			EMIM_Cl in 1 kg electrolyte	0.355932	2.27797				V2AlC	3	141	1.23684		Au	0.15	1.37615e-05	220000000	3027.52			Steel	315.9	70.2	53.915	17031.7
Container	32.85	0.049932						Deposition rate	17	µm/h		6	µm/h				Total	0.03	Baseline assembly	0.494		16.4667										Al2O3	5	102	1.49123		Steel	290	0.0266055	890.126	23.6823			Stainless steel	29.25	6.5	890.126	26036.2
Total cost	0.152		cost	101.333	$/kWh			Thickness	20	µm		0.5	µm			LIB-NMC										Total		2.95553	kg CO2e/kg			Resulting Mxene					Ni	19	0.00174312	4800	8.36697			Other metal (Ni)	2.7	0.6	4800	12960
	€							Pump power	4	kW		7.5	kW			Anode	Cu-foil	0.0077		0.0506698		6.58049										V2C	3	114	1		Sn	66	0.00605505	170000	1029.36
								Other	2	kW		2	kW				Graphite	0.0063		0.0155302		2.46512				MnO2 - GWP											Zn total	417	0.0382569	3900	149.202						Total	162832
Aluminium price for 2020-2030: 2,000 USD/Tm (stable)				2000													Total	0.014		0.0662		4.72857										Costs V2C
Carbonaceous material for cathode price for 2020-2030: 420 - 560 USD/Tm				500				Ar flow	200	sccm	Ar+N flow	21	sccm			Cathode	Al-foil	0.003168		0.027984		8.83333				Material		2.67	Spanos 2015											Total	6750.2	per kg inverter					per kg transformer	361.849
Potential of cost decrease in electrolyte and cell container																	NMC	0.011232		0.147016		13.089				Powder production		1.2	Susarla 2020			Inputs	kg	$/kg	Reference
Man power cost (not included) planned at 2% total material costs								Deposition time	1.17647	h		0.0833333	h				Total	0.0144		0.175		12.1528				Cathode production		2.613	Dai 2019			V2O5	1.59649	9.62	Weber 2019		Mass of inverter for 50 kW at 500 V			9	kg
Machinery depreciation planned at 0.006 €/cell								Consumed Ar	25.12	g		2.6376	g			Separator	PP	0.000933								Total		6.483	kg CO2e/kg			Al	1.02632	0	Recycled									GWP of transformer
																	PE	0.000467														C	0.105263	0.8	Cuskelly 2016		Mass per kW			0.18	kg/kW
Al-gra loading		3.34287	mAh/cm2					Density	7.19	g/cm3 (Cr)		6.73	g/cm3 (Cr2N)				Total	0.0014		0.00331		2.36429				MnO2 - cost																		ABB 2021	Safeplus Air	450	kg
Total capacity		1	Ah					Deposited mass	143.8	g/m2		6.34269	g			Electrolyte	LiPF6 in EC	0.0044		0.0199		4.52273					$/kg	$/kg cathode	with profits			Output					For bidirectional inverter			0.36	kg/kW
Total area		299.144	cm2					Deposition loss	15	%		15	%			Housing	Cr-steel	0.0092		0.0798		8.67391				Li2CO3 in LMO	12.5	2.7				V2C	1	15.4425	$/kg									Material	mass (kg)	Share (%)	GWP (kg CO2 eq./kg)
Separator cost		2.69302e-06	€/cm2	0.0269302	€/m2			Consumed mass	165.37	g/m2		7.29409	g						Clean production	0.0985		2.26959	kg CO2e/kg			LMO		7	7.525															Brass	6.075	1.35	3.1	18.8325
								Wasted mass	21.57	g/m2		0.951403	g					0.0434	Baseline assembly	0.988		22.765				LMO minus Li2CO3		4.3	4.6225	$/kg														Cu in brass	3.645	0.81
Active electrolyte		82.4212	mg/cm2																													GWP V2C												Zn in brass	2.43	0.54
total electrolyte		0.0246558	kg					Sputtering system costs								SI in Thomas 2020										LMO - GWP	kg/kg cathode	CO2/kg																Al	37.35	8.3	7.41	276.764
electrolyte cost		2.34944	€/kg					Power Supply	30000	€		2964.71	$						Kg			CO2-eq.				Li2CO3 in LMO	0.216	3.84211				Inputs	kg	kg CO2 eq/kg	Reference									Cu total	6.075	1.35	3.1	18.8325
								Pumps	20000	€		42000	$			Cell chemistry			LFP-C	LMO-C	NMC-C	LFP-C	LMO-C	NMC-C								V2O5	1.59649	8.1	Weber 2019									Steel	315.9	70.2	2.68	846.612
								Chamber	30000	€		63000	$			Cathode active material (kg)			31.8377	16.0997	21.9402	251.004	204	229.581		LMO incl. Li2CO3		7.31289	kg CO2e/kg			Al	1.02632	0	Recycled									Stainless steel	29.25	6.5	2.68	78.39
								Software, Electronics, Diagnostic Instruments	6000	€		6720	$			Cathode binder (kg)			2.45133	0.25558	1.45253											C	0.105263	2.46512	Delgado 2019									Other metal	2.7	0.6	4.39667	11.871
								Total	86000	€		114685	$			Cathode conductive carbon (kg)			1.9632	0.682235	0.845898
								Exchange-rate	1.12	$/€						Cathode current collector (kg)			2.79962	10.156	3.47421	0	0	0								Output															Total	1251.3
																Cathode total						251.004	204	229.581		TiO2 - GWP						V2C	1	13.1911	kg CO2e/kg
								Yearly Maintenance	2	%		2	%																																		per kg transformer	2.78067
								Life-time	15	years		15	years			Anode active material (kg)			12.1714	15.655	9.77028	115.789	181.865	117.308		Powder production		7.47	Middlemas 2014
																Anode binder (kg)			1.22864	0.586271	0.458027					Cathode production		2.613	Dai 2019			GWP Organic cathode
								Hours per day	16			24				Anode conductive carbon (kg)			0	0.503876	0					Total		10.083	kg CO2e/kg
								Days per year	300			300				Anode current collector (kg)			6.56128	16.6057	11.5781	0	0	0								Iturrondobeita 2021
								Monitoring rate	0.2	(Varied from 0,1 to 0,5)		0.1				Anode total						115.789	181.865	117.308
								Salary	39.6	€/h		25	$/h																			Energy density Organic cathode (Calix4Q)		200	Wh/kg
																Electrolyte (carbonate solvents) (kg)			13.1315	12.6445	10.0202
								Preparations	0.25	h		0.25	h			Electrolyte (lithium ions) (kg)			2.11083	1.50154	1.34697
								Deposition time	1.17647	h		0.0833333	h			Electrolyte total						73.2648	59.0216	49.5286								Total GWP		95	kg CO2/kWh
								Deposition rate	0.854488	m2/h		22.6188	m2/h																			Organic cathode share of GWP		27	%
																Seperator (kg)			2.59465	4.24382	2.42123	16.1179	25.8943	14.9891
								Throughput	4101.54	m2/year		162855	m2/year			Cell container (kg)			6.44115	6.61583	5.30645	41.9462	43.054	34.5074								Organic cathode per Energy		5	kg/kWh
																BMS (kg)			6.61767	6.79714	5.45188	175.745	181.07	146.299								Organic Cathode GWP per Energy		25.65	kg CO2/kWh
																Module casing (kg)			24.9756	25.6529	20.5758	167.288	171.972	137.7
								Electricity consumed	291299	kWh		103142	kWh			Battery inverter (kg)			23.8	23.8	23.8	808.689	808.689	808.689								Organic cathode GWP per mass		5.13	kg CO2/kg
								Electricity cost	0.0805556	€/kWh (estimated)		0.05	$/kWh (estimated)
																Cell assembly and transportation						92.9398	95.3944	76.4578
								Material cost	6.07897	€/kg (estimated)		10	$/kg (estimated)			Module assembly and transportation						10.4874	10.7703	8.6345
								OPEX per year								Battery mass			83.2913	85.5501	68.6141
								Material	4123.2	€		11878.8	$
								Electricity	23465.7	€		5157.12	$
								Salary	38016	€		18000	$
								CAPEX per year														LFP-C	LMO-C	NMC-C
								Maintenance	1720	€		2293.69	$						Absolute GWP from Thomas 2020			7.88386	12.671	10.4639	kg CO2e/kg
								Annuity	5733.33	€		7645.65	$
																			Relative GWP from Thomas 2020			0.753432	1.21093	1
								Yearly costs	73058.3	€		44975.3	$
								Costs	17.8124	€/m2		0.276167	$/m2									LFP	LMO	NMC
																			Absolute GWP relative to Dai 2019			11.1508	17.9217	14.8	kg CO2e/kg
								LCI
								GWP	0.003	g CO2 eq/m2
									18.1411	kg CO2 eq/kg	(of which ca 80% is from electricity)

## Sheet: Cell Properties
Cell	Anode material	Anode Specific Capacity	Anode Density	Anode Volumetric Capacity	Cathode Material	Cathode Specific Capacity	Cathode Density	Cathode Volumetric Capacity	Average Discharge Voltage	Efficiency	Specific Capacity	Specific Energy	Volumetric Capacity	Energy Density
		[mAh g-1]	[g cm-3]	[mAh cm-3]		[mAh g-1]	[g cm-3]	[mAh cm-3]	[V]	[%]	[mAh g-1]	[Wh/kg]	[mAh cm-3]	[Wh/L]
Al-gra	Anolyte (AlCl4-)	48.6701	1.2	58.4041	Graphite	135	2.2	297	2	90	35.7732	71.5464	48.8065	97.613
Al-PPQ	Anolyte (AlCl2+)	344.338	1.2	413.206	pPQ	170	1.6	272	1.4	90	113.811	159.336	164.027	229.637
Al-PBQS	Anolyte (AlCl2+)	344.338	1.2	413.206	PBQS	300	1.6	480	1.6	90	160.322	256.515	222.053	355.284
Al-TiO2	Al metal	2981	2.7	8048.7	TiO	110	4.23	465.3	0.64	40	106.085	67.8947	439.871	281.517
Al-V2C	Al metal	2981	2.7	8048.7	VC	125	3.9	487.5	0.95	65	119.969	113.971	459.659	436.676
Al-MnO2	Al metal	2981	2.7	8048.7	MnO	285	5.01	1427.85	1.3	70	260.13	338.169	1212.71	1576.53
LIB-NMC	Graphite	372	2.2	818.4	NMC	210	4.65	976.5	3.65	94	134.227	489.928	445.244	1625.14
LIB-LFP	Graphite	360	2.2	792	LFP	160	3.65	584	3.3	96	110.769	365.538	336.14	1109.26
Li-DIB	Anolyte (LiPF6 4M)	76.5743	1.4	107.204	Graphite	140	2.2	308	4.5	96	49.4999	222.749	79.5244	357.86
Anode-materials					F	26801	M_Al	27		Molar mass C16 (g/mol)		192
PQ with PVDF-binder	170	1.6	170		r	2	M_AlCl3	133		Molar mass LiPF6 (g/mol)		152
Anolyte with AlCl-	94.2591	1.2	113.111				M_EMIMCl	147		Salt concentration Li-DIB (mol/ml)		0.004
	Anode		Anode and electrolyte		Cathode		Cell			Cell with electrolyte
Cell	Anode Specific Capacity	Anode Volumetric Capacity	Anode Specific Capacity	Anode Volumetric Capacity	Cathode Specific Capacity	Cathode Volumetric Capacity	Average Discharge Voltage	Specific Energy	Energy Density	Specific Capacity	Energy Density
	[mAh g-1]	[mAh cm-3]	[mAh g-1]	[mAh cm-3]	[mAh g-1]	[mAh cm-3]	[V]	[Wh/kg]	[Wh/L]	[mAh g-1]	[Wh/L]
Al-gra	2981	8048.7	48.6701	58.4041	135	297	2	258.302	572.861	71.5464	97.613
Al-PPQ	2981	8048.7	344.338	413.206	170	272	1.4	225.16	368.352	159.336	229.637
Al-PBQS	2981	8048.7	344.338	413.206	300	480	1.6	436.111	724.777	256.515	355.284
Al-TiO2	2981	8048.7	2981	8048.7	110	465.3	0.64	67.8947	281.517	67.8947	281.517
Al-V2C	2981	8048.7	2981	8048.7	125	487.5	0.95	113.971	436.676	113.971	436.676
Al-MnO2	2981	8048.7	2981	8048.7	285	1427.85	1.3	338.169	1576.53	338.169	1576.53
LIB-NMC	372	818.4	372	818.4	210	976.5	3.65	489.928	1625.14	489.928	1625.14
LIB-LFP	372	818.4	372	818.4	160	584	3.3	369.203	1124.66	369.203	1124.66
Li-DIB	372	818.4	76.5743	107.204	140	308	4.5	457.734	1007.02	222.749	357.86
Cell	Specific Energy	Energy Density	Cost	GWP	CSP		CAPEX	OPEX	GWP	CSP
						Pack cost
	[Wh kg-1]	[Wh L-1]	[$ kWh-1]	[kg CO2 eq./kWh]	[kg Si eq./kWh]	[$ kWh-1]	[$ cycle-1 kWh-1]	[$ cycle-1 kWh-1]	[kg/kWh]	[kg/kWh]
KPIs 2030	250	700	70			85	0.03	0.05
Al-gra	52.5552	67.121	124.259	102.239	6712.87	250.641	0.0666384	0.0432279	188.671	16788.3
Al-PPQ	123.655	184.657	38.1909	56.8465	1947.66	121.834	0.0375816	0.0432279	93.1181	6638.32
Al-PBQS	196.888	285.182	23.9728	34.9915	1371.83	86.5389	0.0302409	0.0432279	61.4266	5061.56
Al-TiO2	53.8742	158.721	71.9608	221.996	1871.72	190.989	0.049435	0.0884015	262.316	6956.74
Al-V2C	89.2446	248.192	175.369	164.004	18490.8	265.755	0.059372	0.0571275	192.83	22484.3
Al-MnO2	271.435	895.299	23.2818	32.7604	940.704	67.6985	0.0250808	0.0535533	44.5139	3003.58
LIB-NMC	356.738	865.205	58.7254	38.1943	7823.59	96.7683	0.0297492	0.0416901	50.6204	10390.4
LIB-LFP	261.457	611.804	46.715	45.7573	3870.66	89.6889	0.0290558	0.0409692	61.1363	6886.89
Li-DIB	149.764	172.443	113.191	49.7127	4646.13	186.318	0.0482621	0.0409692	88.8257	11311
Cell	Specific Energy	Energy Density	Cost	GWP	CSP	Pack cost	CAPEX	OPEX	GWP	CSP
	[Wh kg-1]	[Wh L-1]	[$ kWh-1]	[kg CO2 eq./kWh]	[kg Si eq./kWh]	[$ kWh-1]	[$ cycle-1 kWh-1]	[$ cycle-1 kWh-1]	[kg/kWh]	[kg/kWh]
KPIs 2030	250	700	70			85	0.03	0.05
Al-gra	0.210221	0.0958871	1.77513	2.23438	1.7343	2.94872	2.22128	0.864558	3.08608	2.43772
Al-PPQ	0.494621	0.263795	0.545585	1.24235	0.503186	1.43334	1.25272	0.864558	1.52312	0.963907
Al-PBQS	0.78755	0.407402	0.342469	0.76472	0.354417	1.0181	1.00803	0.864558	1.00475	0.734957
Al-TiO2	0.215497	0.226744	1.02801	4.8516	0.483566	2.24693	1.64783	1.76803	4.29067	1.01014
Al-V2C	0.356978	0.35456	2.50527	3.58422	4.77718	3.12653	1.97907	1.14255	3.1541	3.26479
Al-MnO2	1.08574	1.279	0.332597	0.71596	0.243034	0.796453	0.836027	1.07107	0.72811	0.43613
LIB-NMC	1.42695	1.23601	0.838934	0.834714	2.02125	1.13845	0.99164	0.833802	0.827992	1.50872
LIB-LFP	1.04583	0.874006	0.667358	1	1	1.05516	0.968526	0.819384	1	1
Li-DIB	0.599055	0.246347	1.61701	1.08644	1.20035	2.19197	1.60874	0.819384	1.45291	1.6424

## Sheet: References
Short name		Reference
ABB 2021		Utility-scale battery energy storage system (BESS) - BESS 4.0 MWh system design. ABB White Pap. (2021).
Ahmed 2016		Ahmed, S., Nelson, P. A., Gallagher, K. G. & Dees, D. W. Energy impact of cathode drying and solvent recovery during lithium-ion battery manufacturing. J. Power Sources 322, 169–178 (2016).
Arvidsson 2020		Arvidsson, R. et al. A crustal scarcity indicator for long-term global elemental resource assessment in LCA. Int. J. Life Cycle Assess. 25, 1805–1817 (2020).
Batpac 2022		Values from software Batpac 5.0, Developed by Argonne National Laboratory (2022)
Berg 2015		Berg, E. J., Villevieille, C., Streich, D., Trabesinger, S. & Novák, P. Rechargeable Batteries: Grasping for the Limits of Chemistry. J. Electrochem. Soc. 162, A2468–A2475 (2015).
Betz 2019		Betz, J. et al. Theoretical versus Practical Energy: A Plea for More Transparency in the Energy Calculation of Different Rechargeable Battery Systems. Adv. Energy Mater. 9, 1803170 (2019).
Cuskelly 2016		Cuskelly, D. T., Kisi, E. H. & Sugo, H. O. MAX phase - Alumina composites via exchange reaction in the Mn+1AlCn systems (M=Ti, V, Cr, Nb, or Ta). J. Solid State Chem. 233, 150–157 (2016).
Dai 2019		Dai, Q., Kelly, J. C., Gaines, L. & Wang, M. Life cycle analysis of lithium-ion batteries for automotive applications. Batteries 5, (2019).
Delgado 2019		Delgado, M. A. S., Usai, L., Ellingsen, L. A. W., Pan, Q. & Strømman, A. H. Comparative Life Cycle Assessment of a Novel Al-Ion and a Li-Ion Battery for Stationary Applications. Materials (Basel). 12, 1–14 (2019).
Dieterich 2018		Dieterich, V. et al. Estimating the cost of organic battery active materials: a case study on anthraquinone disulfonic acid. Transl. Mater. Res. 5, 034001 (2018).
Ecocosts 2012		Ecocosts 2012 LCA data on emissions and materials depletion (see www.ecocostsvalue.com tab data)
Elia 2021		Elia, G. A. et al. An overview and prospective on Al and Al-ion battery technologies. J. Power Sources 481, 228870 (2021).
Iturrondobeita 2021		Iturrondobeitia, M., Akizu-Gardoki, O., Amondarain, O., Minguez, R. & Lizundia, E. Environmental Impacts of Aqueous Zinc Ion Batteries Based on Life Cycle Assessment. Adv. Sustain. Syst. (2021) doi:10.1002/adsu.202100308.
Merlo 2021		Merlo, A. & Léonard, G. Magnetron Sputtering vs. Electrodeposition for Hard Chrome Coatings: A Comparison of Environmental and Economic Performances. Materials (Basel). 14, 3823 (2021).
Middlemas 2014		Middlemas, S., Fang, Z. & Fan, P. LCA comparison of emerging and traditional TiO 2 manufacturing processes. J. Clean. Prod. 1–11 (2014).
Nordelöf 2019		Nordelöf, A., Alatalo, M. & Söderman, M. L. A scalable life cycle inventory of an automotive power electronic inverter unit—part I: design and composition. Int. J. Life Cycle Assess. 24, 78–92 (2019).
NREL 2021		Vignesh Ramasamy, David Feldman, Jal Desai & Robert Margolis. U.S. Solar Photovoltaic System and Energy Storage Cost Benchmarks: Q1 2021. Natl. Renew. Energy Lab. (2021).
Placke 2018		Placke, T. et al. Perspective on Performance, Cost, and Technical Challenges for Practical Dual-Ion Batteries. Joule 2, 2528–2550 (2018).
Righi 2011		Righi, S. et al. Comparative cradle-to-gate life cycle assessments of cellulose dissolution with 1-butyl-3-methylimidazolium chloride and N-methyl-morpholine-N-oxide. Green Chem. 13, 367–375 (2011).
Spanos 2015		Spanos, C., Turney, D. E. & Fthenakis, V. Life-cycle analysis of flow-assisted nickel zinc-, manganese dioxide-, and valve-regulated lead-acid batteries designed for demand-charge reduction. Renew. Sustain. Energy Rev. 43, 478–494 (2015).
Susarla 2020		Naresh Susarla; Shabbir Ahmed. Estimating the cost and energy demand of producing lithium manganese oxide for Li-ion batteries. Argonne Natl. Lab. (2020).
Thomas 2020		Thomas, L. V., Schmidt, O., Gambhir, A., Few, S. & Staffell, I. Comparative life cycle assessment of lithium-ion battery chemistries for residential storage. J. Energy Storage 28, 101230 (2020).
Weber 2018		Weber, S., Peters, J. F., Baumann, M. & Weil, M. Life Cycle Assessment of a Vanadium Redox Flow Battery. Environ. Sci. Technol. 52, 10864–10873 (2018).
Westlake 2017		Westlake, B. Recycling and Disposal of Battery-Based Grid Energy Storage Systems: A Preliminary Investigation. Electr. Power Res. Inst. (2017).

## Sheet: BatPac Summary
Values from software Batpac 5.0
Developed by Argonne National Laboratory
Summary of Results
Battery System Parameters					Al-gra	Al-pPQ	Al-PBQS	Al-TiO	Al-VC	Al-MnO	LIB-NMC	LIB-LFP	Li-DIB
Battery System Configuration and Performance
Number of battery packs					1	1	1	1	1	1	1	1	1
Packs in series or parallel
Battery system nominal voltage (average OCV), V					984	1008	960	898.56	902.5	1007.5	963.6	910.8	1008
Battery system capacity, Ah					422.764	415.873	438.542	490.785	479.778	455.087	435.866	458.937	410.714
Battery system total energy, kWh					416	419.2	421	441	433	458.5	420	418	414
Battery system useable energy, kWh(Useable)					353.6	356.32	357.85	374.85	368.05	389.725	357	355.3	351.9
Battery system power at target % OCV, kW					1073.7	703.919	688.069	182.297	261.28	201.343	1604.95	2012.15	5583.14
Battery system rated power, kW					100	100	100	100	100	100	100	100	100
Target SOC at full power, %					20	20	20	20	20	20	20	20	20
Pulse time at rated power, s					10	10	10	10	10	10	10	10	10
% OCV at rated power (adjusted for thickness limit), %					80	80	80	80	80	80	80	80	80
Cooling system power requirement, W					645.557	1075.05	1288.19	4242.15	2913.13	6573	982.657	757.995	253.185
Battery System Size
Battery system volume (all packs and cooling), L					12411.3	4487.55	2936.64	5216.48	3416.2	970.023	997.409	1394.07	4837.04
Battery system mass (all packs and cooling), kg					13808.4	5605.6	3742.91	10567.8	6491.22	2089.42	1825.52	2469.28	5908.91
Battery System Metrics
Battery system energy density, Wh/L					33.5178	93.4139	143.361	84.5397	126.749	472.669	421.091	299.842	85.5895
Battery system specific energy, Wh/kg					30.1266	74.7824	112.479	41.7305	66.7055	219.439	230.071	169.28	70.0637
Battery system useable energy density, Wh(Useable)/L					28.4902	79.4018	121.857	71.8588	107.737	401.769	357.928	254.865	72.7511
Battery system useable specific energy, Wh(Useable)/kg					25.6076	63.565	95.6075	35.4709	56.6997	186.523	195.561	143.888	59.5541
Pack Parameters
Pack Configuration and Performance
Number of cells per pack					9840	3600	2400	4212	2850	775	792	1104	4032
Number of modules per pack					12	16	20	36	25	25	12	12	16
Nominal pack voltage (average OCV), V					984	1008	960	898.56	902.5	1007.5	963.6	910.8	1008
Pack capacity, Ah					422.764	415.873	438.542	490.785	479.778	455.087	435.866	458.937	410.714
Pack total energy, kWh					411.175	411.154	411.355	409.389	411.23	409.313	412.634	412.319	412.102
Pack useable energy, kWh(Useable)					349.499	349.481	349.652	347.98	349.546	347.916	350.739	350.471	350.287
Pack power at target %OCV, kW					1073.7	703.919	688.069	182.297	261.28	201.343	1604.95	2012.15	5583.14
Pack power at rated power, kW					100	100	100	100	100	100	100	100	100
Pack Size
Pack length, mm					50266.8	18444.4	12326	14408.4	11714	3248	5470	7591.6	20647.6
Pack width, mm					1648.29	1633.83	1615.09	2436.06	1999.52	2014	1230.23	1236.58	1603.3
Pack height, mm					149.674	148.469	146.908	148.014	145.168	146.133	146.981	147.687	145.925
Pack volume, L					12409.3	4484.75	2933.84	5213.68	3413.4	967.223	994.609	1392.07	4835.84
Pack total mass, kg					13803.4	5598.6	3735.91	10560.8	6484.22	2082.42	1818.52	2464.28	5905.91
Pack Metrics
Pack power to energy ratio (with respect to power at target %OCV)					2.6113	1.71206	1.67269	0.44529	0.635362	0.491903	3.88952	4.88008	13.5479
Pack power to energy ratio (with respect to rated power)					0.243205	0.243218	0.243099	0.244267	0.243173	0.244312	0.242345	0.242531	0.242658
Pack energy density, Wh/L					33.1344	91.6782	140.21	78.522	120.475	423.184	414.871	296.191	85.2183
Pack specific energy, Wh/kg					29.788	73.4388	110.108	38.7649	63.4202	196.557	226.906	167.318	69.7779
Pack useable energy density, Wh(Useable)/L					28.1642	77.9265	119.179	66.7437	102.404	359.707	352.64	251.762	72.4356
Pack useable specific energy, Wh(Useable)/kg					25.3198	62.423	93.5921	32.9502	53.9072	167.073	192.87	142.221	59.3113
Module Parameters
Module Configuration and Performance
Number of cells per module					820	225	120	117	114	31	66	92	252
Nominal module voltage (average OCV), V					82	63	48	24.96	36.1	40.3	80.3	75.9	63
Module capacity, Ah					422.764	415.873	438.542	490.785	479.778	455.087	435.866	458.937	410.714
Module total energy, kWh					34.6667	26.2	21.05	12.25	17.32	18.34	35	34.8333	25.875
Module useable energy, kWh(Useable)					29.4667	22.27	17.8925	10.4125	14.722	15.589	29.75	29.6083	21.9937
Module power at target %OCV, kW					89.4751	43.9949	34.4035	5.0638	10.4512	8.0537	133.746	167.679	348.946
Module power at rated power, kW					8.33333	6.25	5	2.77778	4	4	8.33333	8.33333	6.25
Module Size
Module length, mm					388.823	385.208	380.523	383.843	375.304	378.199	380.743	382.861	377.576
Module width, mm					16728.6	4590.6	2448.6	2387.4	2326.2	633	1347	1877.4	5141.4
Module height, mm					107.674	106.469	104.908	106.014	103.168	104.133	104.981	105.687	103.925
Module volume, L					700.364	188.274	97.7474	97.1499	90.0689	24.9295	53.8406	75.9661	201.747
Module volume per pack, L					8404.37	3012.38	1954.95	3497.4	2251.72	623.237	646.087	911.593	3227.96
Module mass, kg					787.278	239.173	122.13	237.05	204.609	67.0243	112.365	151.474	247.739
Module mass per pack, kg
Module Metrics
Module energy density, Wh/L					49.498	139.159	215.351	126.094	192.297	735.675	650.068	458.538	128.255
Module specific energy, Wh/kg					44.0336	109.544	172.357	51.6769	84.6494	273.632	311.485	229.963	104.444
Module useable energy density, Wh(Useable)/L					42.0733	118.285	183.048	107.18	163.453	625.324	552.557	389.757	109.016
Module useable specific energy, Wh(Useable)/kg					37.4285	93.1126	146.503	43.9254	71.952	232.587	264.762	195.468	88.7778
Cell Parameters
Cell Performance
Cell nominal voltage (average OCV), V					2	1.4	1.6	0.64	0.95	1.3	3.65	3.3	4.5
Cell capacity, Ah					21.1382	83.1746	109.635	163.595	159.926	455.087	145.289	114.734	22.8175
Cell total energy, kWh					0.0422764	0.116444	0.175417	0.104701	0.15193	0.591613	0.530303	0.378623	0.102679
Cell useable energy, kWh(Useable)					0.035935	0.0989778	0.149104	0.0889957	0.12914	0.502871	0.450758	0.32183	0.0872768
Cell power at target %OCV, kW					0.109116	0.195533	0.286696	0.0432803	0.0916772	0.259797	2.02645	1.8226	1.38471
Cell power at rated power, kW					0.0101626	0.0277778	0.0416667	0.0237417	0.0350877	0.129032	0.126263	0.0905797	0.0248016
Cell Size
Cell length, mm					380.823	377.208	372.523	375.843	367.304	370.199	372.743	374.861	369.576
Cell width, mm					106.274	105.069	103.508	104.614	101.768	102.733	103.581	104.287	102.525
Cell thickness, mm					20	20	20	20	20	20	20	20	20
Cell volume, L					0.809435	0.79266	0.771179	0.78637	0.747595	0.760635	0.772181	0.781863	0.757819
Cell volume per pack, L					7964.84	2853.58	1850.83	3312.19	2130.65	589.492	611.567	863.177	3055.52
Cell mass, kg					0.828451	0.947017	0.890182	1.89829	1.6704	2.03935	1.57403	1.51717	0.855162
Cell mass per pack, kg					8151.95	3409.26	2136.44	7995.59	4760.63	1580.49	1246.63	1674.95	3448.01
Cell Metrics
Cell energy density, Wh/L					51.6238	144.084	222.254	123.601	193.007	694.35	674.716	477.676	134.871
Cell specific energy, Wh/kg					50.4388	120.599	192.543	51.2018	86.3815	258.978	330.999	246.167	119.519
Cell useable energy density, Wh(Useable)/L					44.3951	124.868	193.346	113.173	172.741	661.12	583.746	411.619	115.168
Cell useable specific energy, Wh(Useable)/kg					43.3761	104.515	167.499	46.8821	77.3112	246.584	286.371	212.126	102.059
Additional Cell Information
Positive electrode thickness, µm					200	200	200	200	200	200	154	200	200
Negative electrode thickness, µm					5.68511	6.32993	8.78743	5.41837	5.71673	16.4163	192.65	140.541	65.4348
Positive electode areal capacity, mAh/cm²					3.47345	4.12524	5.7268	6.62096	6.98552	20.0598	10.6051	7.73661	3.6021
Negative electrode areal capacity, mAh/cm²					3.74282	4.16733	5.78524	7.13442	7.52726	21.6154	11.4276	8.33659	3.88144

## Sheet: BatPac Manufacturing Costs
Values from software Batpac 5.0
Developed by Argonne National Laboratory
Manufactoring Cost Calculations
					Al-gra	Al-PPQ	Al-PBQS	Al-TiO2	Al-V2C	Al-MnO2	LIB-NMC	LIB-LFP	Li-DIB
Annual Processing Rates
	Energy, kWh per year				4.11175e+07	4.11154e+07	4.11355e+07	4.09389e+07	4.1123e+07	4.09313e+07	4.12634e+07	4.12319e+07	4.12102e+07
: Number of battery packs manufactured per year	Number of battery packs manufactured per year				100000	100000	100000	100000	100000	100000	100000	100000	100000
	Number of row racks per year				400000	400000	400000	600000	500000	500000	300000	300000	400000
: Energy, kWh per year	Number of modules per year				1200000	1600000	2000000	3600000	2500000	2500000	1200000	1200000	1600000
	Number of cell interconnects per year				1872000000	633600000	406000000	684000000	462500000	75000000	126000000	184800000	728000000
: Number of accepted cells per year	Number of accepted cells per year				984000000	360000000	240000000	421200000	285000000	77500000	79200000	110400000	403200000
: Number of cells adjusted for yield	Number of cells adjusted for yield				1.03579e+09	3.78947e+08	2.52632e+08	4.43368e+08	300000000	8.15789e+07	8.33684e+07	1.16211e+08	4.24421e+08
: Electrode area, m² per year	Electrode area, m² per year				6.5661e+08	8.48942e+08	5.37383e+08	1.14115e+09	7.15435e+08	1.92786e+08	1.18972e+08	1.79522e+08	2.80051e+08
: Positive active material, kg per year	Positive active material, kg per year				1.75904e+08	2.0109e+08	1.00135e+08	7.15173e+08	4.16294e+08	1.41285e+08	6.2558e+07	9.32988e+07	7.50249e+07
: Negative active material, kg per year	Negative active material, kg per year				6.70153e+06	9.65021e+06	8.48365e+06	1.11051e+07	7.3512e+06	5.68691e+06	4.11759e+07	4.53178e+07	3.29304e+07
: Positive binder solvent evaporated, kg per year	Positive binder solvent evaporated, kg per year				8.79519e+07	2.6812e+08	1.33513e+08	3.57587e+08	2.08147e+08	7.06426e+07	3.1279e+07	4.66494e+07	3.75124e+07
	Negative binder solvent evaporated, kg per year				3.28238e+06	4.72663e+06	4.15525e+06	5.43924e+06	3.60059e+06	2.78542e+06	2.01678e+07	2.21965e+07	1.61292e+07
: Dry room operating area, m2	Dry room operating area, m2				204446	78654.1	53510	91305.7	62999.4	18284	18664.8	25589.1	87594.8
Calculated Battery Parameters (For Reference Below)
	Number of cells per pack				9840	3600	2400	4212	2850	775	792	1104	4032
	Number of modules per pack				12	16	20	36	25	25	12	12	16
	Number of packs per battery system				1	1	1	1	1	1	1	1	1
				Yield, %
Total Cell Materials per Accepted Cell
Mass ratio of positive binder solvent to mass positive binder (default = 24)					24	24	24	24	24	24	24	24	24
Mass ratio of negative binder solvent to mass negative binder (default = 24)					24	24	24	24	24	24	24	24	24
				92.2
Positive Electrode Materials
: Positive electrode active material, g/cell	Positive electrode active material, g/cell				178.764	558.582	417.23	1697.94	1460.68	1823.03	789.873	845.098	186.074
: Positive electrode carbon additive, g/cell	Positive electrode carbon additive, g/cell				3.72425	31.0324	23.1794	35.3738	30.4308	37.9799	16.4557	17.6062	3.87653
: Positive electrode binder, g/cell	Positive electrode binder, g/cell				3.72425	31.0324	23.1794	35.3738	30.4308	37.9799	16.4557	17.6062	3.87653
: Positive electrode binder solvent (NMP), g/cell	Positive electrode binder solvent (NMP), g/cell				89.382	744.777	556.306	848.971	730.34	911.517	394.937	422.549	93.0368
: Total for positive electrode (dry), g/cell	Total for positive electrode (dry), g/cell				186.212	620.647	463.588	1768.69	1521.54	1898.99	822.785	880.31	193.827
				92.2
Negative Electrode Materials
: Negative electrode active material, g/cell	Negative electrode active material, g/cell				6.8105	26.8061	35.3485	26.3654	25.7937	73.3795	519.898	410.487	81.6727
: Negative electrode carbon additive, g/cell	Negative electrode carbon additive, g/cell				0	0	0	0	0	0	0	0	0
: Negative electrode binder, g/cell	Negative electrode binder, g/cell				0.13899	0.547064	0.721398	0.53807	0.526402	1.49754	10.6102	8.3773	1.66679
: Negative electrode binder solvent (Water), g/cell	Negative electrode binder solvent (Water), g/cell				3.33575	13.1295	17.3136	12.9137	12.6336	35.941	254.644	201.055	40.003
: Total for negative electrode (dry), g/cell	Total for negative electrode (dry), g/cell				6.94949	27.3532	36.0699	26.9035	26.3201	74.877	530.508	418.865	83.3395
Additives, g/cell				92.2
	Positive electrode additve (None), g/cell			92.2	0	0	0	0	0	0	0	0	0
	Negative electrode additve (None), g/cell			99	0	0	0	0	0	0	0	0	0
	Electrolyte additve (None), g/cell				0	0	0	0	0	0	0	0	0
Additional Components				90.2
: Positive current collector, m²	Positive current collector, m²			90.2	0.398826	1.41066	1.34097	1.62123	1.50538	1.49064	0.899586	0.973291	0.41628
: Negative current collector, m²	Negative current collector, m²			98	0.448233	1.48245	1.41049	1.69767	1.57808	1.56335	0.958875	1.03465	0.463667
: Separators, m²	Separators, m²			99	0.703271	2.48629	2.36194	2.85689	2.64958	2.62472	1.58455	1.71488	0.73292
: Electrolyte, L	Electrolyte, L				0.3237	0.191379	0.259311	0.167695	0.161062	0.161656	0.176703	0.171187	0.286664
Annual Cell Materials Rates
Positive Electrode, kg/yr
: Positive electrode active material, kg/yr	Positive electrode active material, kg/yr				1.75904e+08	2.0109e+08	1.00135e+08	7.15173e+08	4.16294e+08	1.41285e+08	6.2558e+07	9.32988e+07	7.50249e+07
: Positive electrode carbon additive, kg/yr	Positive electrode carbon additive, kg/yr				3.66466e+06	1.11716e+07	5.56306e+06	1.48994e+07	8.67278e+06	2.94344e+06	1.30329e+06	1.94373e+06	1.56302e+06
: Positive electrode binder, kg/yr	Positive electrode binder, kg/yr			99.5	3.66466e+06	1.11716e+07	5.56306e+06	1.48994e+07	8.67278e+06	2.94344e+06	1.30329e+06	1.94373e+06	1.56302e+06
: Positive electrode binder solvent, kg/yr	Positive electrode binder solvent, kg/yr				7.2657e+06	2.21494e+07	1.10295e+07	2.95402e+07	1.7195e+07	5.83578e+06	2.58396e+06	3.85371e+06	3.0989e+06
Negative Electrode Material, kg/yr
: Negative electrode active material, kg/yr	Negative electrode active material, kg/yr				6.70153e+06	9.65021e+06	8.48365e+06	1.11051e+07	7.3512e+06	5.68691e+06	4.11759e+07	4.53178e+07	3.29304e+07
: Negative electrode conductive additive, kg/yr	Negative electrode conductive additive, kg/yr				0	0	0	0	0	0	0	0	0
: Negative electrode binder, kg/yr	Negative electrode binder, kg/yr			0	136766	196943	173136	226635	150025	116059	840325	924853	672050
: Negative electrode binder solvent, kg/yr	Negative electrode binder solvent, kg/yr				3.28238e+06	4.72663e+06	4.15525e+06	5.43924e+06	3.60059e+06	2.78542e+06	2.01678e+07	2.21965e+07	1.61292e+07
Additives, kg/yr
	Positive electrode additve (None), kg/yr				0	0	0	0	0	0	0	0	0
	Negative electrode additve (None), kg/yr				0	0	0	0	0	0	0	0	0
	Electrolyte additve (None), kg/yr				0	0	0	0	0	0	0	0	0
Additional Components
: Positive current collector, m²	Positive current collector, m²				3.92445e+08	5.07837e+08	3.21833e+08	6.82863e+08	4.29034e+08	1.15525e+08	7.12472e+07	1.07451e+08	1.67844e+08
: Negative current collector, m²	Negative current collector, m²				4.41062e+08	5.33681e+08	3.38517e+08	7.1506e+08	4.49752e+08	1.21159e+08	7.59429e+07	1.14226e+08	1.86951e+08
: Separators, m²	Separators, m²				6.92018e+08	8.95063e+08	5.66866e+08	1.20332e+09	7.5513e+08	2.03416e+08	1.25497e+08	1.89323e+08	2.95513e+08
: Electrolyte, L	Electrolyte, L				3.18521e+08	6.88964e+07	6.22346e+07	7.06331e+07	4.59026e+07	1.25283e+07	1.39949e+07	1.88991e+07	1.15583e+08
: Number of negative terminals	Number of negative terminals				1.03579e+09	3.78947e+08	2.52632e+08	4.43368e+08	300000000	8.15789e+07	8.33684e+07	1.16211e+08	4.24421e+08
: Number of positive terminals	Number of positive terminals				1.03579e+09	3.78947e+08	2.52632e+08	4.43368e+08	300000000	8.15789e+07	8.33684e+07	1.16211e+08	4.24421e+08
: Number of cell containers	Number of cell containers				1.03579e+09	3.78947e+08	2.52632e+08	4.43368e+08	300000000	8.15789e+07	8.33684e+07	1.16211e+08	4.24421e+08
: Number of aluminum thermal conductors	Number of aluminum thermal conductors				984000000	360000000	240000000	421200000	285000000	77500000	79200000	110400000	403200000
: Positive binder solvent evaporated in dryer, kg	Positive binder solvent evaporated in dryer, kg				8.79519e+07	2.6812e+08	1.33513e+08	3.57587e+08	2.08147e+08	7.06426e+07	3.1279e+07	4.66494e+07	3.75124e+07
: Negative binder solvent evaporated in dryer, kg	Negative binder solvent evaporated in dryer, kg				3.28238e+06	4.72663e+06	4.15525e+06	5.43924e+06	3.60059e+06	2.78542e+06	2.01678e+07	2.21965e+07	1.61292e+07
: NMP solvent evaporated in dryer, kg	NMP solvent evaporated in dryer, kg				8.79519e+07	2.6812e+08	1.33513e+08	3.57587e+08	2.08147e+08	7.06426e+07	3.1279e+07	4.66494e+07	3.75124e+07
			Baseline	p
Unit Cell Materials Costs
Positive Electrode, $/kg			5	1
: Positive electrode active material, $/kg	Positive electrode active material, $/kg		7	1	5	2	2	1.8	12	4.2	23	9.5	5
: Positive electrode carbon additive, $/kg	Positive electrode carbon additive, $/kg		15	1	7	7	7	7	7	7	7	7	7
: Positive electrode binder, $/kg	Positive electrode binder, $/kg		2.7	1	15	15	15	15	15	15	15	15	15
: Positive electrode binder solvent, $/kg	Positive electrode binder solvent, $/kg				2.7	2.7	2.7	2.7	2.7	2.7	2.7	2.7	2.7
Negative electrode material, $/kg			10	1
: Negative electrode active material, $/kg	Negative electrode active material, $/kg		7	1	10	10	10	10	10	5	9	9	10
: Negative electrode carbon additive, $/kg	Negative electrode carbon additive, $/kg		10	1	7	7	7	7	7	7	7	7	7
: Negative electrode binder, $/kg	Negative electrode binder, $/kg		0	1	10	10	10	10	10	10	10	10	10
	Negative electrode binder solvent, $/kg				0	0	0	0	0	0	0	0	0
Additional Components			0.2	1
: Positive current collector, $/m²	Positive current collector, $/m²		0.4	1	0.2	0.2	0.2	0.2	0.2	0.2	0.2	0.2	0.2
: Negative current collector, $/m²	Negative current collector, $/m²		2.4	1	0.4	0.2	0.2	0.2	0.4	0.2	1.2	1.2	1.2
: Separators, $/m²	Separators, $/m²		3	1	2.4	0.1	0.1	0.2	0.2	0.1	0.2	0.2	0.9
: Electrolyte, $/L	Electrolyte, $/L				3	2	2	2	2	2	10	10	26
Hardware Costs, $/unit				0.85
: Hardware Costs: Positive terminal, $/unit	Hardware Costs: Positive terminal, $/unit			0.85	0.0833738	0.0934412	0.097791	0.0916653	0.095539	0.112054	0.111886	0.107529	0.0918101
: Hardware Costs: Negative terminal $/unit	Hardware Costs: Negative terminal $/unit			0.85	0.13621	0.145791	0.14951	0.143831	0.146555	0.163459	0.25057	0.246977	0.229351
: Hardware Costs: Cell container $/unit	Hardware Costs: Cell container $/unit				0.253125	0.276952	0.286114	0.272011	0.278611	0.320933	0.321432	0.311309	0.2701
Cell Materials Cost, $/cell
Positive Electrode (dry)
: Positive electrode active material, $/cell	Positive electrode active material, $/cell				0.89382	1.11716	0.834459	3.0563	17.5282	7.65675	18.1671	8.02843	0.930368
: Positive electrode carbon additive, $/cell	Positive electrode carbon additive, $/cell				0.0260697	0.217227	0.162256	0.247617	0.213016	0.265859	0.11519	0.123243	0.0271357
: Positive electrode binder, $/cell	Positive electrode binder, $/cell				0.0558637	0.465485	0.347691	0.530607	0.456462	0.569698	0.246835	0.264093	0.058148
: Positive electrode binder solvent (NMP), $/cell	Positive electrode binder solvent (NMP), $/cell				0.229265	1.91035	1.42693	2.17761	1.87332	2.33804	1.01301	1.08384	0.238639
Negative Electrode Material (dry)
: Negative electrode active material, $/cell	Negative electrode active material, $/cell				0.068105	0.268061	0.353485	0.263654	0.257937	0.366897	4.67908	3.69439	0.816727
: Negative electrode carbon additive, $/cell	Negative electrode carbon additive, $/cell				0	0	0	0	0	0	0	0	0
: Negative electrode binder, $/cell	Negative electrode binder, $/cell				0.0013899	0.00547064	0.00721398	0.0053807	0.00526402	0.0149754	0.106102	0.083773	0.0166679
	Negative electrode binder solvent (Binder solvent for negative electrode), $/cell				0	0	0	0	0	0	0	0	0
Additives
	Positive electrode additve (None), $/cell				0	0	0	0	0	0	0	0	0
	Negative electrode additve (None), $/cell				0	0	0	0	0	0	0	0	0
	Electrolyte additve (None), $/cell				0	0	0	0	0	0	0	0	0
Other Cell Materials
: Positive current collector, $/cell	Positive current collector, $/cell				0.0797652	0.282132	0.268194	0.324247	0.301076	0.298129	0.179917	0.194658	0.083256
: Negative current collector, $/cell	Negative current collector, $/cell				0.179293	0.29649	0.282097	0.339535	0.631231	0.312669	1.15065	1.24159	0.556401
: Separators, $/cell	Separators, $/cell				1.68785	0.248629	0.236194	0.571379	0.529916	0.262472	0.31691	0.342976	0.659628
: Electrolyte, $/cell	Electrolyte, $/cell				0.971101	0.382758	0.518621	0.33539	0.322123	0.323311	1.76703	1.71187	7.45326
: Positive terminal, $/unit	Positive terminal, $/unit				0.0833738	0.0934412	0.097791	0.0916653	0.095539	0.112054	0.111886	0.107529	0.0918101
: Negative terminal , $/unit	Negative terminal , $/unit				0.13621	0.145791	0.14951	0.143831	0.146555	0.163459	0.25057	0.246977	0.229351
: Cell container, $/unit	Cell container, $/unit				0.253125	0.276952	0.286114	0.272011	0.278611	0.320933	0.321432	0.311309	0.2701
: Total cost of cell materials, $/cell	Total cost of cell materials, $/cell				4.66523	5.70995	4.97055	8.35922	22.6392	13.0052	28.4257	17.4347	11.4315
			Baseline	p
Cost of Module Purchased Items, $/module				0.85
: Aluminum thermal conductors, $/module	Aluminum thermal conductors, $/module				193.629	57.0153	31.1342	29.2263	28.7824	8.91559	18.9267	25.6928	62.0342
	Module management system (MMS)			0.85	94.6829	102.476	73.1562	92.7236	90.3934	75.6526	57.076	59.7681	40.3214
	Cell interconnects (copper) $/module			0.85	250.332	39.8646	34.3605	31.3421	30.934	5.25934	18.7112	27.0632	78.8421
	Interconnect panel, PP, $/module			0.85	12.1803	3.71482	2.20768	2.12214	2.10579	0.928131	1.48205	1.85095	4.09791
	Module terminals and tabs from end cells, $/module			0.85	0.584045	0.561276	0.551137	0.520752	0.543196	0.531492	0.586225	0.592322	0.561276
: Cell interconnects (copper) $/module	Module enclosure, $/module			0.85	95.1988	26.6768	14.5455	14.2828	13.6564	4.51568	8.54544	11.528	29.1358
: Module management system (MMS)	Provision for gas release, $/module				0.687215	0.658191	0.636525	0.582807	0.615572	0.615572	0.687215	0.687215	0.658191
: Total cost for module materials and purchased items, $/module	Total cost for module materials and purchased items, $/module				647.294	230.967	156.592	170.8	167.031	96.4184	106.015	127.183	215.651
Cost of Battery Pack Purchased Items, $/pack
	Row rack materials (not including cooling panels materials), $/pack				1685.66	622.823	416.435	733.056	489.038	150.497	144.905	197.808	681.826
	Elastomer pads between modules, $/pack				1.6	2.4	3.2	6	4	4	1.8	1.8	2.4
	Module Interconnects and signal wiring, $/pack				6.2221	7.98769	9.94809	18.9135	12.9477	12.6141	5.86429	5.95118	7.98769
	Bus bar for battery packs, $/pack				2.02436	1.97815	2.03033	3.68159	25.7704	8.76294	11.6817	16.325	1.9522
	Cooling panels, S.S., $/pack				1260.02	610.401	502.429	713.144	470.505	133.691	179.062	249.72	666.571
	Coolant manifolds, $/pack				10.8245	10.7428	10.637	15.6752	12.9525	13.0343	8.17785	8.21374	10.5704
	Pack terminals and seals, $/pack				1.67728	1.6654	1.68975	1.72473	1.72234	1.66564	1.68784	1.71738	1.6654
	Pack jacket steel, $/pack				2126.82	782.13	521.501	870.923	596.881	176.889	189.725	260.702	860.172
	Pack jacket aluminum, $/pack				2831.53	1037.56	689.331	1167.9	793.353	231.947	246.51	340.15	1138.18
	Pack jacket insulation, $/pack				530.96	193.74	128.288	221.397	149.089	42.5514	44.6199	61.9601	212.618
	Baseline thermal system, $/pack				120	120	120	120	120	120	120	120	120
	Heating system, $/pack				20	20	20	20	20	20	20	20	20
	Total cost for pack materials and purchased items, $/pack				8597.34	3411.43	2425.49	3892.41	2696.26	915.652	974.032	1284.35	3723.94
	Total cost of battery management system, $/pack				678.954	877.592	777.066	1477.01	1086.44	937.13	467.168	477.628	431.113
Cost of Additional Purchased Items
	Additions to AC system, $/battery system				80	120	160	440	320	680	120	80	40
	Additional for multiple packs, $/additional pack				0	0	0	0	0	0	0	0	0
	Total cost for addition to AC system, $/battery system				80	120	160	440	320	680	120	80	40
		↓
If "X", used in the calculation of plant utilization
			Baseline
Electrode Processing			Plant	p
Materials Preparation/mixing
Positive materials (positive mass/yr)
	Mass ratio (mass/baseline mass)		29000	0.9	2.20337	2.51885	1.25429	8.95828	5.2145	1.76974	0.783603	1.16866	0.939763
	Direct labor, hours/year		220	0.9	59044.2	66601	35559.7	208641	128201	48474.9	23285.4	33367.1	27423
	Capital equipment, million$		9400	0.95	447.922	505.249	269.763	1582.8	972.556	367.741	176.648	253.13	208.036
	Plant area, m²				19909.6	22608.4	11657.6	75464.3	45131.5	16167.5	7456.22	10900.2	8861.26
Negative materials (negative mass/yr)
	Mass ratio (mass/baseline mass)		37000	0.9	0.141093	0.203173	0.178613	0.233805	0.154771	0.119731	0.86691	0.954112	0.69331
	Direct labor, hours/year		300	0.9	6349.73	8816.21	7850.97	10003.9	6901.15	5477.56	32537	35468.3	26609.5
	Capital equipment, million$		9400	0.95	51.4843	71.4828	63.6565	81.1128	55.9553	44.4127	263.814	287.581	215.753
	Plant area, m²				1462.71	2068.24	1829.97	2363.41	1597.1	1251.48	8207.35	8989.74	6637.57
Electrode Coating
Positive materials (area/yr)
	Area ratio (area/baseline area)		0.119505		0.804588	1.04027	0.658491	1.39833	0.876671	0.236234	0.145785	0.21998	0.343166
	Solvent evaporated, kg/m2		10000	0.7	0.133948	0.315828	0.248451	0.313356	0.290937	0.36643	0.26291	0.259854	0.133948
	Direct labor, hours/year		110	0.9	8588.19	10280.2	7464.23	12645.2	9119.81	3641.99	2597.75	3464.72	4729.91
	Capital equipment, million$		22500	0.95	92.5379	138.432	87.4297	180.373	116.742	37.5596	22.7624	32.8856	42.9791
	Plant area, m²				18301.1	23359.8	15128.8	30939.4	19855.3	5712.9	3611.67	5338.83	8145.38
Negative materials (area/yr)
	Area ratio (area/baseline area)		0.0690375		0.804588	1.04027	0.658491	1.39833	0.876671	0.236234	0.145785	0.21998	0.343166
	Solvent evaporated, kg/m2yr		8000	0.7	0.00499898	0.00556768	0.00773239	0.00476645	0.00503272	0.0144483	0.169517	0.123642	0.0575937
	Direct labor, hours/year		110	0.9	6870.55	8224.15	5971.38	10116.2	7295.84	2913.59	2078.2	2771.78	3783.93
	Capital equipment, million$		22500	0.95	53.5018	68.8874	48.7454	87.1491	57.8748	21.9556	23.268	31.634	40.5139
	Plant area, m²				18301.1	23359.8	15128.8	30939.4	19855.3	5712.9	3611.67	5338.83	8145.38
Calendering
Positive materials (area/yr)
	Area ratio (area/baseline area)		8000	0.7	0.804588	1.04027	0.658491	1.39833	0.876671	0.236234	0.145785	0.21998	0.343166
	Direct labor, hours/year		30	0.9	6870.55	8224.15	5971.38	10116.2	7295.84	2913.59	2078.2	2771.78	3783.93
	Capital equipment, million$		3000	0.95	24.6682	31.085	20.5976	40.5667	26.6486	8.18707	5.30227	7.67831	11.4571
	Plant area, m²				2440.15	3114.64	2017.18	4125.25	2647.38	761.721	481.556	711.844	1086.05
Negative materials (area/yr)
	Area ratio (area/baseline area)		9000	0.7	0.804588	1.04027	0.658491	1.39833	0.876671	0.236234	0.145785	0.21998	0.343166
	Direct labor, hours/year		30	0.9	7729.37	9252.16	6717.8	11380.7	8207.83	3277.79	2337.98	3118.25	4256.92
	Capital equipment, million$		3000	0.95	24.6682	31.085	20.5976	40.5667	26.6486	8.18707	5.30227	7.67831	11.4571
	Plant area, m²				2440.15	3114.64	2017.18	4125.25	2647.38	761.721	481.556	711.844	1086.05
Notching
Positive materials (area/yr)
	Area ratio (area/baseline area)		14000	0.7	0.804588	1.04027	0.658491	1.39833	0.876671	0.236234	0.145785	0.21998	0.343166
	Direct labor, hours/year		110	0.9	12023.5	14392.3	10449.9	17703.3	12767.7	5098.79	3636.86	4850.61	6621.87
	Capital equipment, million$		4500	0.95	90.4501	113.978	75.5244	148.745	97.7115	30.0193	19.4416	28.1538	42.0094
	Plant area, m²				3660.22	4671.96	3025.76	6187.87	3971.07	1142.58	722.335	1067.77	1629.08
Negative materials (area/yr)
	Area ratio (area/baseline area)		14000	0.7	0.804588	1.04027	0.658491	1.39833	0.876671	0.236234	0.145785	0.21998	0.343166
	Direct labor, hours/year		110	0.9	12023.5	14392.3	10449.9	17703.3	12767.7	5098.79	3636.86	4850.61	6621.87
	Capital equipment, million$		4500	0.95	90.4501	113.978	75.5244	148.745	97.7115	30.0193	19.4416	28.1538	42.0094
	Plant area, m²				3660.22	4671.96	3025.76	6187.87	3971.07	1142.58	722.335	1067.77	1629.08
Vacuum Drying of Electrodes (area/yr)
	Area ratio (area/baseline area)		7000	0.7	0.804588	1.04027	0.658491	1.39833	0.876671	0.236234	0.145785	0.21998	0.343166
	Direct labor, hours/year		10	0.9	6011.73	7196.13	5224.96	8851.65	6383.86	2549.39	1818.43	2425.3	3310.94
	Capital equipment, million$		2600	0.95	8.22274	10.3617	6.86586	13.5222	8.88286	2.72902	1.76742	2.55944	3.81903
	Plant area, m²				2114.8	2699.36	1748.22	3575.21	2294.39	660.158	417.349	616.932	941.244
Cell Assembly in Dry Room
Electrode Slitting (area/yr)
	Area ratio (area/baseline area)		49000	0.7	0.804588	1.04027	0.658491	1.39833	0.876671	0.236234	0.145785	0.21998	0.343166
	Direct labor, hours/year		90	0.9	42082.1	50372.9	36574.7	61961.6	44687	17845.8	12729	16977.1	23176.6
	Capital equipment, million$		0	0.95	74.0046	93.255	61.7927	121.7	79.9458	24.5612	15.9068	23.0349	34.3713
	Plant area, m²				0	0	0	0	0	0	0	0	0
Cell Stacking (number of cells/yr)
	Cell ratio (number of cells/baseline number of cells)		100	0.95	4.92	1.8	1.2	2.106	1.425	0.3875	0.396	0.552	2.016
	Cell Capacity, Ah		73000	0.9	21.1382	83.1746	109.635	163.595	159.926	455.087	145.289	114.734	22.8175
	Direct labor, hours/year		150	0.9	69969.1	104006	93872.7	227781	156848	131207	45223.9	48727.8	33706.9
	Capital equipment, million$		0	0.95	143.772	213.711	192.889	468.043	322.291	269.603	92.9259	100.126	69.2607
	Plant area, m²				0	0	0	0	0	0	0	0	0
Current Collector Welding (number of cells/yr)
	Cell ratio (number of cells/baseline number of cells)		18000	0.9	4.92	1.8	1.2	2.106	1.425	0.3875	0.396	0.552	2.016
	Direct labor, hours/year		140	0.9	75516.4	30550.5	21209.8	35187.2	24757.4	7668.62	7819.85	10544.3	33830.9
	Capital equipment, million$		0	0.95	587.35	237.615	164.965	273.678	192.558	59.6448	60.821	82.0112	263.129
	Plant area, m²				0	0	0	0	0	0	0	0	0
X-ray Inspection of Cells (number of cells/yr)
	Cell ratio (number of cells/baseline number of cells)		18000	0.9	4.92	1.8	1.2	2.106	1.425	0.3875	0.396	0.552	2.016
	Direct labor, hours/year		140	0.9	75516.4	30550.5	21209.8	35187.2	24757.4	7668.62	7819.85	10544.3	33830.9
	Capital equipment, million$		0	0.95	587.35	237.615	164.965	273.678	192.558	59.6448	60.821	82.0112	263.129
	Plant area, m²				0	0	0	0	0	0	0	0	0
Inserting Cell in Container (number of cell/yr)
	Cell ratio (number of cells/baseline number of cells)		6000	0.9	4.92	1.8	1.2	2.106	1.425	0.3875	0.396	0.552	2.016
	Direct labor, hours/year		10	0.9	25172.1	10183.5	7069.92	11729.1	8252.48	2556.21	2606.62	3514.77	11277
	Capital equipment, million$		0	0.95	41.9535	16.9725	11.7832	19.5485	13.7541	4.26034	4.34436	5.85794	18.795
	Plant area, m²				0	0	0	0	0	0	0	0	0
Electrolyte Filling, and Cell Sealing (number of cells/yr)
	Cell ratio (number of cells/baseline number of cells)		12000	0.9	4.92	1.8	1.2	2.106	1.425	0.3875	0.396	0.552	2.016
	Direct labor, hours/year		10	0.9	50344.2	20367	14139.8	23458.2	16505	5112.41	5213.23	7029.53	22554
	Capital equipment, million$		0	0.95	41.9535	16.9725	11.7832	19.5485	13.7541	4.26034	4.34436	5.85794	18.795
	Plant area, m²				0	0	0	0	0	0	0	0	0
Dry Room and Dry Room Control System (number of cells/year and area/year)
	Ratio (number of cells/baseline number of cells) or (area/baseline area)		5000	0.7	4.92	1.8	1.2	2.106	1.425	0.3875	0.396	0.552	2.016
	Direct labor, hours/year		5.5	0.9	15252.7	7545.03	5680.63	8421.53	6406.79	2574.9	2614.31	3298.58	8167.96
	Capital equipment, million$		45000	0.95	23.0744	9.33486	6.48076	10.7517	7.56478	2.34319	2.3894	3.22187	10.3372
	Plant area, m²				204446	78654.1	53510	91305.7	62999.4	18284	18664.8	25589.1	87594.8
Formation Cycling
Aging, Loading, Formation, DC/AC IR Measurements, Sealing, Packing (number of cells/yr)
	Cell ratio (number of cells/baseline number of cells)		100	0.3	4.92	1.8	1.2	2.106	1.425	0.3875	0.396	0.552	2.016
	Cell Capacity, Ah		63000	0.7	21.1382	83.1746	109.635	163.595	159.926	455.087	145.289	114.734	22.8175
	Direct labor, hours/year		690	0.95	120569	89955.7	73578.8	122996	92936.6	51116.3	36846.5	43311.8	66063.9
	Capital equipment, million$		90000	0.95	1966.69	1255.3	927.789	1785.08	1223.32	485.879	352.145	449.771	862.175
	Plant area, m²				256525	148850	110015	211670	145058	57614.1	41756.3	53332.6	112458
Module Assembly
Module assembly (modules/year)
	Module ratio (modules/baseline modules)		24000	0.7	0.12	0.16	0.2	0.36	0.25	0.25	0.12	0.12	0.16
	Direct labor, hours/year		100	0.95	5440.49	6654.19	7779.15	11738.8	9094.3	9094.3	5440.49	5440.49	6654.19
	Capital equipment, million$		30000	0.95	13.342	17.5353	21.676	37.8868	26.7943	26.7943	13.342	13.342	17.5353
	Plant area, m²				4002.61	5260.6	6502.79	11366	8038.3	8038.3	4002.61	4002.61	5260.6
Pack Assembly
Pack assembly (packs/year)
	Pack ratio (pakcs/baseline packs)		12	0.3	0.2	0.2	0.2	0.2	0.2	0.2	0.2	0.2	0.2
	Number of modules per Pack		24000	0.7	12	16	20	36	25	25	12	12	16
	Direct labor, hours/year		100	0.95	7779.15	8480.35	9067.49	10816	9695.27	9695.27	7779.15	7779.15	8480.35
	Capital equipment, million$		30000	0.95	21.676	23.6298	25.2658	30.138	27.0151	27.0151	21.676	21.676	23.6298
	Plant area, m²				6502.79	6502.79	6502.79	6502.79	6502.79	6502.79	6502.79	6502.79	6502.79
Warehouse
Shipping, Receiving, and Storage (energy/year)
	Energy ratio (energy/baseline energy)		13000	0.7	0.873725	0.873681	0.874107	0.869929	0.873843	0.869769	0.876826	0.876155	0.875695
	Direct labor, hours/year		210	0.95	11827.8	11827.4	11831.5	11791.9	11829	11790.3	11857.2	11850.9	11846.5
	Capital equipment, million$		10600	0.95	184.725	184.716	184.802	183.962	184.749	183.93	185.348	185.213	185.121
	Plant area, m²				9324.21	9323.76	9328.08	9285.72	9325.4	9284.1	9355.64	9348.84	9344.18
Building and Supporting Systems
Building Support Systems (energy/year)
	Energy ratio (energy/baseline energy)		0	1	0.873725	0.873681	0.874107	0.869929	0.873843	0.869769	0.876826	0.876155	0.875695
	Direct labor, hours/year		1790	0.95	0	0	0	0	0	0	0	0	0
	Capital equipment, million$		0	0.6	1574.56	1574.48	1575.21	1568.06	1574.76	1567.79	1579.87	1578.72	1577.93
	Plant area, m²				0	0	0	0	0	0	0	0	0
Binder Solvent (NMP) Recovery (kg/yr)
	Mass ratio (mass/baseline mass)		15000	0.7	2.20337	6.71695	3.34479	8.95828	5.2145	1.76974	0.783603	1.16866	0.939763
	Direct labor, hours/year		30	0.95	26076.7	56899.9	34926	69606.3	47658.5	22368.1	12646.2	16729.1	14361.6
	Capital equipment, million$		1000	0.95	63.5412	183.204	94.4651	240.843	144.037	51.5983	23.7965	34.7877	28.2806
	Plant area, m²				2118.04	6106.79	3148.84	8028.11	4801.23	1719.94	793.215	1159.59	942.687
Rejected Cell and Scrap Recycle (number of cells/yr)
	Cell ratio (number of cells/baseline number of cells)		30000	0.7	4.92	1.8	1.2	2.106	1.425	0.3875	0.396	0.552	2.016
	Direct labor, hours/year		10	0.9	91516	45270.2	34083.8	50529.2	38440.7	15449.4	15685.8	19791.5	49007.7
	Capital equipment, million$		3000	0.95	41.9535	16.9725	11.7832	19.5485	13.7541	4.26034	4.34436	5.85794	18.795
	Plant area, m²				13629.8	5243.61	3567.33	6087.05	4199.96	1218.93	1244.32	1705.94	5839.66
Control Laboratory (energy/yr)
	Energy ratio (energy/baseline energy)		50000	0.7	0.873725	0.873681	0.874107	0.869929	0.873843	0.869769	0.876826	0.876155	0.875695
	Direct labor, hours/year		20	0.95	45491.7	45490.1	45505.6	45353.3	45496	45347.4	45604.7	45580.2	45563.5
	Capital equipment, million$		2000	0.95	17.5928	17.592	17.6002	17.5202	17.5951	17.5172	17.6522	17.6393	17.6305
	Plant area, m²				1759.28	1759.2	1760.02	1752.02	1759.51	1751.72	1765.22	1763.93	1763.05
Direct Labor Summary, hrs/year
Direct labor: electrode processing, hrs/year					125511	147378	95660.2	307162	198940	79446.4	74006.8	93088.5	87141.8
Direct labor: cell assembly, hours/year					353853	253576	199757	403726	282214	174634	84026.8	100636	166544
Direct labor: formation cycling, testing and sealing, hrs/year					120569	89955.7	73578.8	122996	92936.6	51116.3	36846.5	43311.8	66063.9
Direct labor: module assembly, hrs/year					5440.49	6654.19	7779.15	11738.8	9094.3	9094.3	5440.49	5440.49	6654.19
Direct labor: pack assembly, hrs/year					7779.15	8480.35	9067.49	10816	9695.27	9695.27	7779.15	7779.15	8480.35
Direct labor: warehouse, hrs/year					11827.8	11827.4	11831.5	11791.9	11829	11790.3	11857.2	11850.9	11846.5
Direct labor: building and support systems, hrs/year					163084	147660	114515	165489	131595	83164.9	73936.7	82100.9	108933
Total direct labor, hrs/year					788065	665532	512190	1.03372e+06	736305	418941	293894	344208	455664
Capital Equipment Summary, $millions
Capital equipment: electrode processing, $mil					883.905	1084.54	668.704	2323.58	1460.73	550.81	537.748	679.454	618.034
Capital equipment: cell assembly, $mil					1499.46	825.476	614.658	1186.95	822.426	424.318	241.553	302.121	677.818
Capital equipment: formation cycling, testing and sealing, $mil					1966.69	1255.3	927.789	1785.08	1223.32	485.879	352.145	449.771	862.175
Capital equipment: module assembly, $mil					13.342	17.5353	21.676	37.8868	26.7943	26.7943	13.342	13.342	17.5353
Capital equipment: pack assembly, $mil					21.676	23.6298	25.2658	30.138	27.0151	27.0151	21.676	21.676	23.6298
Capital equipment: warehouse, $mil					184.725	184.716	184.802	183.962	184.749	183.93	185.348	185.213	185.121
Capital equipment: building and support systems, $mil					1697.65	1792.25	1699.06	1845.97	1750.15	1641.16	1625.66	1637	1642.64
Total cost of capital equipment, $mil					6267.44	5183.45	4141.96	7393.57	5495.19	3339.91	2977.47	3288.58	4026.95
Building and Land, square meters
Building: electrode processing, m²					72290	89668.9	55579.2	163908	101971	33313.5	25712.1	34743.7	38161.1
Building: cell assembly, m²					204446	78654.1	53510	91305.7	62999.4	18284	18664.8	25589.1	87594.8
Building: formation cycling, testing and sealing, m²					256525	148850	110015	211670	145058	57614.1	41756.3	53332.6	112458
Building: module assembly, m²					4002.61	5260.6	6502.79	11366	8038.3	8038.3	4002.61	4002.61	5260.6
Building: pack assembly, m²					6502.79	6502.79	6502.79	6502.79	6502.79	6502.79	6502.79	6502.79	6502.79
Building: warehouse, m²					9324.21	9323.76	9328.08	9285.72	9325.4	9284.1	9355.64	9348.84	9344.18
Building: building and support systems, m²					17507.1	13109.6	8476.18	15867.2	10760.7	4690.59	3802.75	4629.46	8545.4
Total building, land and utilities area, m²					570598	351370	249914	509905	344655	137727	109797	138149	267866
Summary for Cost of Cells Only
Direct labor, hours/year					766961	642512	487456	1.0033e+06	709630	392291	272769	323088	432632
Capital equipment, million$					6063.13	4938.57	3850.64	7128.91	5223.37	2927.5	2577.98	2938.81	3756.38
Plant area, m²					553877	333390	230689	485846	323897	116997	93054.5	121411	249874
Summary for Cost of Modules Only
Direct labor, hours/year					776344	653109	499179	1.01897e+06	722667	405316	282162	332479	443235
Capital equipment, million$					6157.67	5055.18	3994.51	7272.59	5362.67	3142.33	2755.57	3095.24	3884.96
Plant area, m²					560987	341759	240301	500307	335044	128130	100176	128530	258249
Summary for Battery Pack
Direct labor, hours/year					788065	665532	512190	1.03372e+06	736305	418941	293894	344208	455664
Capital equipment, million$					6267.44	5183.45	4141.96	7393.57	5495.19	3339.91	2977.47	3288.58	4026.95
Plant area, m²					570598	351370	249914	509905	344655	137727	109797	138149	267866
			1	* To change this, go to dashboard
Method to calculate plant utilization
Packs manufactured at 100% utilization (packs/yr)					100000	100000	100000	100000	100000	100000	100000	100000	100000
Percent plant utilization (%)					1	1	1	1	1	1	1	1	1
Actual number of packs manufactured per year (packs/yr)					100000	100000	100000	100000	100000	100000	100000	100000	100000
Packs manufactured at 100% utilization (pack/yr)
Percent plant utilization (%)
			1	* To change this, go to dashboard
Pack manufacturing strategy:
			1	* To change this, go to dashboard
Pack cost option:
			↓
Profit and warranty from cell manufacturer
Profit and warranty from module manufacturer			x
Profit on pack			x
Warranty on pack
Investment Costs
Capital equipment and building support cost including installation, mil$					6063.13	4938.57	3850.64	7128.91	5223.37	2927.5	2577.98	2938.81	3756.38
Cost of building and land, mil$					1661.63	1000.17	692.068	1457.54	971.692	350.991	279.163	364.233	749.621
Launch costs (5% of direct annual materials + 10% of other annual costs), mil$					246.002	115.905	69.7461	195.272	336.511	57.9743	118.956	103.612	240.235
Working capital (15% of annual variable costs), mil$					713.296	328.027	194.089	556.976	988.679	162.554	347.282	299.777	706.041
Total investment, mil$					8684.06	6382.68	4806.55	9338.7	7520.25	3499.02	3323.38	3706.44	5452.28
Unit Cost of Cells, $/cell
Variable Cost
Total cost of cell materials and purchased items, $/cell					4.66523	5.70995	4.97055	8.35922	22.6392	13.0052	28.4257	17.4347	11.4315
Direct labor at $25/hour, $/cell					0.0194858	0.0446189	0.0507766	0.0595503	0.0622482	0.126546	0.0861014	0.073163	0.0268249
Variable overhead, $/cell					0.147915	0.319995	0.370034	0.396929	0.425546	0.851391	0.720694	0.594651	0.21565
Total variable cost, $/cell					4.83263	6.07457	5.39136	8.8157	23.127	13.9832	29.2325	18.1025	11.674
Fixed Expenses
Depreciation, $/cell					0.700605	1.51074	1.74862	1.86555	2.00323	4.00386	3.43127	2.82693	1.0246
General, sales, administration, $/cell					0.217001	0.468838	0.542356	0.580506	0.622757	1.24545	1.05952	0.873686	0.316769
Research and development, $/cell					0.280242	0.604296	0.699446	0.746218	0.801293	1.60155	1.37251	1.13077	0.40984
Total fixed expenses, $/cell					1.19785	2.58387	2.99042	3.19227	3.42728	6.85086	5.86329	4.83139	1.75121
Additional Costs
Profits on initial investment, $/cell					0	0	0	0	0	0	0	0	0
Warranty on cells, $/cell					0	0	0	0	0	0	0	0	0
Total Cost
Total cell cost, $/cell					6.03048	8.65844	8.38178	12.008	26.5543	20.834	35.0958	22.9339	13.4252
Total cell cost per pack, $/pack					59339.9	31170.4	20116.3	50577.6	75679.7	16146.4	27795.9	25319	54130.3
Investment Costs for Modules
Capital equipment and building support cost including installation, mil$					6157.67	5055.18	3994.51	7272.59	5362.67	3142.33	2755.57	3095.24	3884.96
Cost of building and land, mil$					1682.96	1025.28	720.904	1500.92	1005.13	384.39	300.527	385.59	774.747
Launch costs (5% of direct annual materials + 10% of other annual costs), mil$					285.083	134.678	85.7629	226.402	357.747	70.5353	125.726	111.61	257.807
Working capital (15% of annual variable costs), mil$					830.174	383.902	241.603	649.787	1051.85	199.474	366.979	323.221	758.277
Total investment, mil$					8955.89	6599.04	5042.78	9649.7	7777.41	3796.73	3548.8	3915.67	5675.79
Unit Cost of Modules, $/module
Variable Cost
Total cost of module materials and purchased items, $/module					4472.78	1515.71	753.058	1148.83	2747.9	499.581	1982.11	1731.17	3096.39
Direct labor at $25/hour, $/module					16.1738	10.2048	6.23973	7.0762	7.22667	4.05316	5.87838	6.92664	6.92554
Variable overhead, $/module					123.122	73.6797	46.0455	47.403	49.8126	28.2975	50.7819	57.5713	56.1744
Total variable cost, $/module					4612.08	1599.59	805.343	1203.31	2804.94	531.932	2038.77	1795.67	3159.49
Fixed Expenses
Depreciation, $/module					583.263	347.989	217.748	222.863	234.61	133.381	242.153	274.003	267.021
General, sales, administration, $/module					180.64	107.968	67.5083	69.3354	72.9122	41.4329	74.7033	84.6253	82.5302
Research and development, $/module					233.305	139.195	87.0992	89.145	93.8438	53.3525	96.8612	109.601	106.808
Total fixed expenses, $/module					997.208	595.153	372.355	381.343	401.366	228.167	413.717	468.23	456.359
Additional Costs
Profits on initial investment, $/module					0	0	0	0	0	0	0	0	0
Warranty (includes modules only), $/module					0	0	0	0	0	0	0	0	0
Total Cost
Total module cost, $/module					5609.29	2194.74	1177.7	1584.65	3206.3	760.098	2452.49	2263.9	3615.85
Total module cost per pack, $/pack					67311.4	35115.9	23554	57047.5	80157.6	19002.5	29429.9	27166.8	57853.5
Investment Costs
Capital equipment and building support cost including installation, mil$					6267.44	5183.45	4141.96	7393.57	5495.19	3339.91	2977.47	3288.58	4026.95
Cost of building and land, mil$					1711.79	1054.11	749.741	1529.72	1033.97	413.182	329.391	414.447	803.599
Launch costs (5% of direct annual materials + 10% of other annual costs), mil$					331.753	156.452	102.145	253.571	377.002	80.2708	133.446	120.877	278.938
Working capital (15% of annual variable costs), mil$					969.753	448.73	290.195	730.812	1109.11	227.974	389.368	350.335	821.137
Total investment, mil$					9280.75	6842.74	5284.04	9907.66	8015.26	4061.34	3829.68	4174.24	5930.63
Unit Cost of One Battery Pack, $
Variable Cost
Total cost of pack materials and purchased items, $/pack					62949.7	28540.3	18263.7	46727.3	72480.2	14342.3	25226.5	22536	53697.2
Direct labor at $25/hour, $/pack					197.016	166.383	128.047	258.43	184.076	104.735	73.4734	86.052	113.916
Variable overhead, $/pack					1503.47	1208.65	954.585	1735.06	1276.06	751.194	657.823	733.582	931.317
Total variable cost, $/pack					64650.2	29915.4	19346.4	48720.8	73940.3	15198.2	25957.8	23355.7	54742.5
Fixed Expenses
Depreciation, $/pack					7123.34	5710.5	4516.83	8158.42	6012.17	3546.5	3142.17	3495.81	4428.75
General, sales, administration, $/pack					2205.96	1771.38	1399.86	2537.98	1868.08	1100.61	968.366	1078.86	1368.5
Research and development, $/pack					2849.34	2284.2	1806.73	3263.37	2404.87	1418.6	1256.87	1398.32	1771.5
Total fixed expenses, $/pack					12178.6	9766.09	7723.42	13959.8	10285.1	6065.71	5367.4	5972.99	7568.75
Additional Costs
Profits on initial investment, $/pack					4640.37	3421.37	2642.02	4953.83	4007.63	2030.67	1914.84	2087.12	2965.31
Warranty (includes pack only), $/pack					4562.27	2413.76	1663.86	3787.53	4941.05	1304.5	1861.44	1759.28	3655.49
Total Cost
Total cost per pack, $/pack					86031.5	45516.6	31375.7	71421.9	93174.1	24599.1	35101.5	33175.1	68932
Total pack cost, $/battery system					86031.5	45516.6	31375.7	71421.9	93174.1	24599.1	35101.5	33175.1	68932
Cost of integration w/ air conditioning (AC), $/battery system					80	120	160	440	320	680	120	80	40
Total battery system cost, $/battery system					86111.5	45636.6	31535.7	71861.9	93494.1	25279.1	35221.5	33255.1	68972
Errors in unit materials and processing costs (default = 10), ±%					10	10	10	10	10	10	10	10	10
Errors in electrode thickness and capacity limits (default = 5), ±%					5	5	5	5	5	5	5	5	5
Maximum price to consumer for battery system, $					99028.2	52482.1	36266	82641.2	107518	29071	40504.7	38243.3	79317.8
Minimum price to consumer for battery system, $					73194.7	38791.1	26805.3	61082.6	79470	21487.2	29938.3	28266.8	58626.2
Breakdown of Materials and Purchased Item Costs, $/pack
Positive active material					8795.19	4021.79	2002.7	12873.1	49955.2	5933.98	14388.3	8863.39	3751.24
Negative active material					670.153	965.021	848.365	1110.51	735.12	284.345	3705.84	4078.6	3293.04
Carbon additive					256.526	782.015	389.414	1042.96	607.095	206.041	91.2304	136.061	109.411
Binders					563.376	1695.44	851.773	2257.58	1315.92	453.122	279.526	384.044	301.658
Solvents					2255.97	6877.27	3424.62	9172.1	5338.97	1811.98	802.306	1196.56	962.194
Positive current collector					784.89	1015.67	643.665	1365.73	858.068	231.05	142.494	214.903	335.688
Negative current collector					1764.25	1067.36	677.034	1430.12	1799.01	242.319	911.315	1370.71	2243.41
Separators					16608.4	895.063	566.866	2406.65	1510.26	203.416	250.993	378.645	2659.62
Electrolyte					9555.63	1377.93	1244.69	1412.66	918.052	250.566	1399.49	1889.91	30051.5
Additives					0	0	0	0	0	0	0	0	0
Cell purchased items					4651.45	1858.26	1280.2	2137.62	1484.01	462.245	541.64	735.06	2383.97
Module purchased items					7767.53	3695.47	3131.84	6148.81	4175.77	2410.46	1272.18	1526.19	3450.41
Pack purchased items					8597.34	3411.43	2425.49	3892.41	2696.26	915.652	974.032	1284.35	3723.94
Battery management system					678.954	877.592	777.066	1477.01	1086.44	937.13	467.168	477.628	431.113
Total cost					62949.7	28540.3	18263.7	46727.3	72480.2	14342.3	25226.5	22536	53697.2
% of Cost of recovered NMP (Ahmed 2016)		0.36129			815.058	2484.69	1237.28	3313.79	1928.92	654.652	289.865	432.305	347.631
Breakdown of Pack Costs, $/pack
Total cost of materials					41254.4	18697.6	10649.1	33071.4	63037.7	9616.82	21971.5	18512.8	43707.8
Total cost of purchased items					21016.3	8965.16	6837.52	12178.8	8356.04	3788.36	2787.85	3545.6	9558.33
Total cost of battery management system					678.954	877.592	777.066	1477.01	1086.44	937.13	467.168	477.628	431.113
Total cost of direct labor					197.016	166.383	128.047	258.43	184.076	104.735	73.4734	86.052	113.916
Cost of variable overhead					1503.47	1208.65	954.585	1735.06	1276.06	751.194	657.823	733.582	931.317
Cost of general, sales, administration					2205.96	1771.38	1399.86	2537.98	1868.08	1100.61	968.366	1078.86	1368.5
Cost of research and development					2849.34	2284.2	1806.73	3263.37	2404.87	1418.6	1256.87	1398.32	1771.5
Cost of depreciation					7123.34	5710.5	4516.83	8158.42	6012.17	3546.5	3142.17	3495.81	4428.75
Per unit profit					4640.37	3421.37	2642.02	4953.83	4007.63	2030.67	1914.84	2087.12	2965.31
Warranty (includes battery pack(s) only)					4562.27	2413.76	1663.86	3787.53	4941.05	1304.5	1861.44	1759.28	3655.49
Total pack cost					86031.5	45516.6	31375.7	71421.9	93174.1	24599.1	35101.5	33175.1	68932
Breakdown of Pack Costs, $/kWh
Cells per pack					9840	3600	2400	4212	2850	775	792	1104	4032
Usable energy per pack (kWh)					349.499	349.481	349.652	347.98	349.546	347.916	350.739	350.471	350.287
BatPaC Total cost of cell materials (excl. Solvents)					111.584	33.8224	20.662	68.6801	165.068	22.4331	60.356	49.4086	122.03
Non-BatPaC Total cost of cell materials					124.259	38.1909	23.9728	71.9608	175.369	23.2818	58.7254	46.715	113.191
Solvents incl. Recovery					2.33208	7.10966	3.53861	9.52293	5.51835	1.88163	0.826441	1.2335	0.992419
Cell purchased items					13.3089	5.31721	3.66135	6.14293	4.24554	1.32861	1.54428	2.09735	6.80576
Module purchased items					22.2248	10.5742	8.95702	17.67	11.9463	6.92827	3.62713	4.35469	9.85026
Pack purchased items					24.5991	9.7614	6.93687	11.1857	7.7136	2.63182	2.77709	3.66463	10.6311
Total cost of battery management system					1.94265	2.51113	2.2224	4.24453	3.10815	2.69355	1.33195	1.36282	1.23074
Total cost of direct labor					0.563711	0.476086	0.366214	0.742656	0.526615	0.301036	0.209482	0.245533	0.325208
Cost of variable overhead					4.3018	3.45843	2.7301	4.98608	3.65063	2.15912	1.87553	2.09313	2.65873
Cost of general, sales, administration					6.31178	5.06862	4.0036	7.29345	5.3443	3.16342	2.76093	3.07832	3.90679
Cost of research and development					8.15264	6.53598	5.16723	9.37803	6.87998	4.07742	3.58348	3.98984	5.05728
Cost of depreciation					20.3816	16.34	12.9181	23.4451	17.1999	10.1935	8.9587	9.9746	12.6432
Per unit profit					13.2772	9.78986	7.55615	14.236	11.4652	5.83665	5.45944	5.95519	8.46538
Warranty (includes battery pack(s) only)					13.0538	6.90669	4.75862	10.8843	14.1356	3.74946	5.3072	5.01977	10.4357
Total pack cost					254.709	122.04	86.7891	191.692	267.103	68.2263	96.9871	89.7844	186.193

[truncated: 4 more sheets: BatPac Recycling, Mass Contents, Sensitivity Energy Density, Utility System Costs]
